# Supplementary material for: Identification of KIF4A as a pan-cancer diagnostic and prognostic biomarker via bioinformatics analysis and validation in osteosarcoma cell lines
Source: PeerJ journal article supplement (doi:10.7717/peerj.11455), 2021-05-21
Supplement: fig2A-PCR-raw_data.zip [file fig2A-PCR-raw_data.zip]

## Sheet: KIF4A
sample	actin Ct	KIF4A ct	△Ct	sample	actin Ct	KIF4A ct	△Ct	-△△Ct	2-△△Ct	Average	SD
HFOB1.19	20.26	24.8767	4.61667	HFOB1.19	20.42	25.04	4.62	-0.00333333	0.997692
HFOB1.19	20.26	24.8767	4.61667	HFOB1.19	20.2	24.66	4.46	0.156667	1.11471
HFOB1.19	20.26	24.8767	4.61667	HFOB1.19	20.16	24.93	4.77	-0.153333	0.899171	1.00386	0.107901
HFOB1.19	20.26	24.8767	4.61667	mg63	21.48	22.35	0.87	3.74667	13.4233
HFOB1.19	20.26	24.8767	4.61667	mg63	21.41	22.39	0.98	3.63667	12.4379
HFOB1.19	20.26	24.8767	4.61667	mg63	21.55	22.43	0.88	3.73667	13.3306	13.0639	0.54415
HFOB1.19	20.26	24.8767	4.61667	U-20S	21.01	23.38	2.37	2.24667	4.74585
HFOB1.19	20.26	24.8767	4.61667	U-20S	20.76	23.38	2.62	1.99667	3.99077
HFOB1.19	20.26	24.8767	4.61667	U-20S	21	23.44	2.44	2.17667	4.52108	4.41923	0.387707
HFOB1.19	20.26	24.8767	4.61667	HOS	20.68	23.51	2.83	1.78667	3.45017
HFOB1.19	20.26	24.8767	4.61667	HOS	20.56	23.26	2.7	1.91667	3.7755
HFOB1.19	20.26	24.8767	4.61667	HOS	20.36	23.19	2.83	1.78667	3.45017	3.55861	0.187829

## Sheet: STIL
sample	actin Ct	STIL ct	△Ct	sample	actin Ct	STIL ct	△Ct	-△△Ct	2-△△Ct	Average	SD
HFOB1.19	20.26	30.71	10.45	HFOB1.19	20.42	30.88	10.46	-0.01	0.993092
HFOB1.19	20.26	30.71	10.45	HFOB1.19	20.2	30.84	10.64	-0.19	0.876606
HFOB1.19	20.26	30.71	10.45	HFOB1.19	20.16	30.41	10.25	0.2	1.1487	1.00613	0.136514
HFOB1.19	20.26	30.71	10.45	mg63	21.48	28.37	6.89	3.56	11.7942
HFOB1.19	20.26	30.71	10.45	mg63	21.41	28.27	6.86	3.59	12.042
HFOB1.19	20.26	30.71	10.45	mg63	21.55	28.1	6.55	3.9	14.9285	12.9216	1.7425
HFOB1.19	20.26	30.71	10.45	U-20S	21.01	28.86	7.85	2.6	6.06287
HFOB1.19	20.26	30.71	10.45	U-20S	20.76	28.79	8.03	2.42	5.35171
HFOB1.19	20.26	30.71	10.45	U-20S	21	28.96	7.96	2.49	5.61778	5.67745	0.359314
HFOB1.19	20.26	30.71	10.45	HOS	20.68	28.95	8.27	2.18	4.53154
HFOB1.19	20.26	30.71	10.45	HOS	20.56	28.95	8.39	2.06	4.16986
HFOB1.19	20.26	30.71	10.45	HOS	20.36	28.98	8.62	1.83	3.55537	4.08559	0.493509
													HFOB1.19	1.00613	0.136514
													mg63	12.9216	1.7425
													U-20S	5.67745	0.359314
													HOS	4.08559	0.493509
