# Supplementary material for: Identification of KIF4A as a pan-cancer diagnostic and prognostic biomarker via bioinformatics analysis and validation in osteosarcoma cell lines
Source: PeerJ journal article supplement (doi:10.7717/peerj.11455), 2021-05-21
Supplement: fig3A-PCR-raw-data.zip [file fig3A-PCR-raw-data.zip]

## Sheet: U2OS
sample	actin Ct	KIF4A ct	△Ct	sample	actin Ct	KIF4A ct	△Ct	-△△Ct	2-△△Ct	Average	SD
NC	20.7833	23.8567	3.07333	空白	21.01	23.86	2.85	0.223333	1.16743
NC	20.7833	23.8567	3.07333	空白	20.65	23.76	3.11	-0.0366667	0.974905				空白	1.00699	0.147046
NC	20.7833	23.8567	3.07333	空白	20.69	23.95	3.26	-0.186667	0.878633	1.00699	0.147046		NC	0.988449	0.166967
NC	20.7833	23.8567	3.07333	NC	20.75	23.92	3.17	-0.0966667	0.935191				KIF4A-1	0.0348013	0.00223149
NC	20.7833	23.8567	3.07333	NC	21.04	23.88	2.84	0.233333	1.17555				KIF4A-2	0.0616697	0.00237869
NC	20.7833	23.8567	3.07333	NC	20.75	24.05	3.3	-0.226667	0.854607	0.988449	0.166967		KIF4A-3	0.027199	0.00212446
NC	20.7833	23.8567	3.07333	KIF4A-1	20.44	28.26	7.82	-4.74667	0.0372487				OE-NC	0.967005	0.123392
NC	20.7833	23.8567	3.07333	KIF4A-1	20.19	28.13	7.94	-4.86667	0.0342758				OE-KIF4A	3.22347	0.859456
NC	20.7833	23.8567	3.07333	KIF4A-1	20.25	28.25	8	-4.92667	0.0328795	0.0348013	0.00223149
NC	20.7833	23.8567	3.07333	KIF4A-2	20.88	28.01	7.13	-4.05667	0.0600927
NC	20.7833	23.8567	3.07333	KIF4A-2	20.96	27.99	7.03	-3.95667	0.0644058
NC	20.7833	23.8567	3.07333	KIF4A-2	20.89	28.01	7.12	-4.04667	0.0605107	0.0616697	0.00237869
NC	20.7833	23.8567	3.07333	KIF4A-3	20.17	28.38	8.21	-5.13667	0.0284256
NC	20.7833	23.8567	3.07333	KIF4A-3	20.36	28.57	8.21	-5.13667	0.0284256
NC	20.7833	23.8567	3.07333	KIF4A-3	20.23	28.64	8.41	-5.33667	0.0247459	0.027199	0.00212446
NC	20.7833	23.8567	3.07333	OE-NC	19.32	22.32	3	0.0733333	1.05214
NC	20.7833	23.8567	3.07333	OE-NC	19.04	22.08	3.04	0.0333333	1.02337
NC	20.7833	23.8567	3.07333	OE-NC	19.63	22.98	3.35	-0.276667	0.825496	0.967005	0.123392
NC	20.7833	23.8567	3.07333	OE-KIF4A	21.05	22.05	1	2.07333	4.20858
NC	20.7833	23.8567	3.07333	OE-KIF4A	21.09	22.66	1.57	1.50333	2.83497
NC	20.7833	23.8567	3.07333	OE-KIF4A	21.08	22.76	1.68	1.39333	2.62685	3.22347	0.859456

## Sheet: Mg63
sample	actin Ct	KIF4A ct	△Ct	sample	actin Ct	KIF4A ct	△Ct	-△△Ct	2-△△Ct	Average	SD
Control	20.3733	22.1933	1.82	Control	20.27	22.18	1.91	-0.09	0.939523
Control	20.3733	22.1933	1.82	Control	20.35	22.23	1.88	-0.06	0.959264
Control	20.3733	22.1933	1.82	Control	20.5	22.17	1.67	0.15	1.10957	1.00279	0.093003
Control	20.3733	22.1933	1.82	NC	20.18	22.16	1.98	-0.16	0.895025
Control	20.3733	22.1933	1.82	NC	20.24	22.08	1.84	-0.02	0.986233
Control	20.3733	22.1933	1.82	NC	20.07	21.91	1.84	-0.02	0.986233	0.95583	0.0526588
Control	20.3733	22.1933	1.82	KIF4A-1	20.44	28.2	7.76	-5.94	0.0162885
Control	20.3733	22.1933	1.82	KIF4A-1	20.61	28.52	7.91	-6.09	0.01468
Control	20.3733	22.1933	1.82	KIF4A-1	20.64	28.63	7.99	-6.17	0.0138882	0.0149522	0.00122311
Control	20.3733	22.1933	1.82	KIF4A-2	20.78	24.76	3.98	-2.16	0.223756
Control	20.3733	22.1933	1.82	KIF4A-2	20.68	24.95	4.27	-2.45	0.183011
Control	20.3733	22.1933	1.82	KIF4A-2	20.52	24.92	4.4	-2.58	0.167241	0.191336	0.029163
Control	20.3733	22.1933	1.82	KIF4A-3	20.33	24.92	4.59	-2.77	0.146604
Control	20.3733	22.1933	1.82	KIF4A-3	20.54	24.88	4.34	-2.52	0.174343
Control	20.3733	22.1933	1.82	KIF4A-3	20.43	25.05	4.62	-2.8	0.143587	0.154845	0.0169531
Control	20.3733	22.1933	1.82	OE-NC	20.26	22.31	2.05	-0.23	0.852635
Control	20.3733	22.1933	1.82	OE-NC	20.36	22.25	1.89	-0.07	0.952638
Control	20.3733	22.1933	1.82	OE-NC	20.15	22.19	2.04	-0.22	0.858565	0.887946	0.0561032
Control	20.3733	22.1933	1.82	OE-KIF4A	19.82	20.63	0.81	1.01	2.01391
Control	20.3733	22.1933	1.82	OE-KIF4A	20.94	20.41	-0.53	2.35	5.09824
Control	20.3733	22.1933	1.82	OE-KIF4A	19.98	20.73	0.75	1.07	2.09943	3.07053	1.75657
