# Supplementary material for: Identification of KIF4A as a pan-cancer diagnostic and prognostic biomarker via bioinformatics analysis and validation in osteosarcoma cell lines
Source: PeerJ journal article supplement (doi:10.7717/peerj.11455), 2021-05-21
Supplement: fig3C-CCK8-raw-data.zip [file fig3C-CCK8-raw-data.zip]

## Sheet: cck8数据
1.U-20S cell 24h after transfected							1.MG63 cell 24h after transfected
	Control	siRNA-NC	si-KIF4A	oe-NC	oe-KIF4A			Control	siRNA-NC	si-KIF4A	oe-NC	oe-KIF4A
first	1.1158	1.1136	0.9574	1.1549	1.2021		first	0.9404	0.901	0.8539	0.9361	1.0516
second	1.1229	1.1329	0.9934	1.1147	1.2206		second	0.9454	0.9412	0.8606	0.9481	1.0112
third	1.1255	1.1161	1.0109	1.1624	1.1952		third	0.9423	0.9462	0.8951	0.9415	1.0681
fourth	1.1986	1.1395	1.0355	1.1385	1.2076		fourth	0.9439	0.9473	0.8213	0.9374	1.0487
fifth	1.1134	1.1463	1.0106	1.1493	1.2119		fifth	0.9532	0.9538	0.8681	0.9627	1.0573
OD value	1.13524	1.12968	1.00156	1.14396	1.20748		OD value	0.94504	0.9379	0.8598	0.94516	1.04738
1.U-20S cell 48h after transfected							2.MG63 cell 48h after transfected
	Control	siRNA-NC	si-KIF4A	oe-NC	oe-KIF4A			Control	siRNA-NC	si-KIF4A	oe-NC	oe-KIF4A
first	1.311	1.2962	1.1705	1.3251	1.5127		first	1.1478	1.2755	0.9562	1.1921	1.4621
second	1.3206	1.2928	1.1032	1.3375	1.5483		second	1.1776	1.1943	0.9894	1.2013	1.1806
third	1.3389	1.3411	1.1545	1.3402	1.5117		third	1.2049	1.2141	0.9549	1.2206	1.499
fourth	1.3478	1.3149	1.195	1.3761	1.5206		fourth	1.2084	1.2727	0.9834	1.1954	1.4715
fifth	1.3576	1.3375	1.2584	1.3218	1.5144		fifth	1.2165	1.215	0.9187	1.2016	1.4834
OD value	1.33518	1.3165	1.17632	1.34014	1.52154		OD value	1.19104	1.23432	0.96052	1.2022	1.41932
3.U-20S after 72h transfected							3.MG63 cell 72h after transfected
	Control	siRNA-NC	si-KIF4A	oe-NC	oe-KIF4A			Control	siRNA-NC	si-KIF4A	oe-NC	oe-KIF4A
first	1.7381	1.7989	1.3483	1.7495	1.9541		first	1.5556	1.6045	1.1852	1.6215	1.8952
second	1.7012	1.7746	1.3868	1.7562	1.9657		second	1.5648	1.6247	1.1058	1.6119	1.8421
third	1.7048	1.7933	1.3956	1.7703	1.9728		third	1.6149	1.618	1.1731	1.6318	1.8752
fourth	1.7126	1.7318	1.3168	1.7498	1.9669		fourth	1.62	1.5992	1.1218	1.6246	1.8667
fifth	1.7152	1.7387	1.3271	1.7621	1.9843		fifth	1.629	1.607	1.1256	1.6271	1.8941
OD value	1.71438	1.76746	1.35492	1.75758	1.96876		OD value	1.59686	1.61068	1.1423	1.62338	1.87466
