# Supplementary material for: Identification of KIF4A as a pan-cancer diagnostic and prognostic biomarker via bioinformatics analysis and validation in osteosarcoma cell lines
Source: PeerJ. 2021 May 21;9:e11455. doi: 10.7717/peerj.11455 (PMC8142929; doi:10.7717/peerj.11455)
Supplement: Supplemental Information 2 [file peerj-09-11455-s002.xlsx]

## Sheet: Biological Process (GO)
#term ID	term description	observed gene count	background gene count	false discovery rate	matching proteins in your network (IDs)	matching proteins in your network (labels)
GO:1903047	mitotic cell cycle process	25	564	6.02e-29	ENSP00000166345,ENSP00000209728,ENSP00000216911,ENSP00000217026,ENSP00000219097,ENSP00000240423,ENSP00000251496,ENSP00000262300,ENSP00000286398,ENSP00000300403,ENSP00000301633,ENSP00000307288,ENSP00000312995,ENSP00000325017,ENSP00000335357,ENSP00000336868,ENSP00000342307,ENSP00000345571,ENSP00000349961,ENSP00000356319,ENSP00000360944,ENSP00000363524,ENSP00000378356,ENSP00000405726,ENSP00000415430	AURKA,BIRC5,CDC45,CDC6,CDKN3,CENPA,CLSPN,E2F1,FOXM1,GTSE1,KIF14,KIF20A,KIF4A,MCM7,MYBL2,NCAPD2,NCAPG,NCAPH,ORC6,PKMYT1,SMC2,SMC4,STIL,TPX2,TRIP13
GO:0022402	cell cycle process	26	890	1.93e-26	ENSP00000166345,ENSP00000209728,ENSP00000216911,ENSP00000217026,ENSP00000219097,ENSP00000240423,ENSP00000251496,ENSP00000262300,ENSP00000286398,ENSP00000300403,ENSP00000301633,ENSP00000307288,ENSP00000312995,ENSP00000320147,ENSP00000325017,ENSP00000335357,ENSP00000336868,ENSP00000342307,ENSP00000345571,ENSP00000349961,ENSP00000356319,ENSP00000360944,ENSP00000363524,ENSP00000378356,ENSP00000405726…	AURKA,BIRC5,CDC45,CDC6,CDKN3,CENPA,CLSPN,E2F1,EZH2,FOXM1,GTSE1,KIF14,KIF20A,KIF4A,MCM7,MYBL2,NCAPD2,NCAPG,NCAPH,ORC6,PKMYT1,SMC2,SMC4,STIL,TPX2,TRIP13
GO:0007049	cell cycle	28	1263	2.77e-26	ENSP00000166345,ENSP00000209728,ENSP00000216911,ENSP00000217026,ENSP00000219097,ENSP00000240423,ENSP00000251496,ENSP00000262300,ENSP00000286398,ENSP00000300403,ENSP00000301633,ENSP00000307288,ENSP00000312995,ENSP00000320147,ENSP00000325017,ENSP00000335357,ENSP00000336868,ENSP00000342307,ENSP00000345571,ENSP00000349961,ENSP00000356319,ENSP00000360944,ENSP00000363524,ENSP00000378356,ENSP00000405726…	AURKA,BIRC5,CDC45,CDC6,CDCA3,CDKN3,CENPA,CLSPN,E2F1,EZH2,FOXM1,GTSE1,HJURP,KIF14,KIF20A,KIF4A,MCM7,MYBL2,NCAPD2,NCAPG,NCAPH,ORC6,PKMYT1,SMC2,SMC4,STIL,TPX2,TRIP13
GO:0140014	mitotic nuclear division	11	136	9.83e-14	ENSP00000216911,ENSP00000217026,ENSP00000240423,ENSP00000251496,ENSP00000286398,ENSP00000300403,ENSP00000301633,ENSP00000325017,ENSP00000349961,ENSP00000356319,ENSP00000363524	AURKA,BIRC5,KIF14,KIF4A,MYBL2,NCAPD2,NCAPG,NCAPH,SMC2,SMC4,TPX2
GO:0000280	nuclear division	12	268	2.62e-12	ENSP00000166345,ENSP00000216911,ENSP00000217026,ENSP00000240423,ENSP00000251496,ENSP00000286398,ENSP00000300403,ENSP00000301633,ENSP00000325017,ENSP00000349961,ENSP00000356319,ENSP00000363524	AURKA,BIRC5,KIF14,KIF4A,MYBL2,NCAPD2,NCAPG,NCAPH,SMC2,SMC4,TPX2,TRIP13
GO:0051301	cell division	14	483	2.89e-12	ENSP00000209728,ENSP00000216911,ENSP00000240423,ENSP00000251496,ENSP00000286398,ENSP00000300403,ENSP00000301633,ENSP00000325017,ENSP00000336868,ENSP00000349961,ENSP00000356319,ENSP00000363524,ENSP00000378356,ENSP00000442068	AURKA,BIRC5,CDC6,CDCA3,CENPA,KIF14,KIF20A,KIF4A,NCAPD2,NCAPG,NCAPH,SMC2,SMC4,TPX2
GO:0010564	regulation of cell cycle process	15	684	1.06e-11	ENSP00000166345,ENSP00000209728,ENSP00000216911,ENSP00000262300,ENSP00000300403,ENSP00000301633,ENSP00000312995,ENSP00000320147,ENSP00000342307,ENSP00000345571,ENSP00000356319,ENSP00000360944,ENSP00000378356,ENSP00000405726,ENSP00000415430	AURKA,BIRC5,CDC45,CDC6,CLSPN,E2F1,EZH2,FOXM1,GTSE1,KIF14,KIF20A,PKMYT1,STIL,TPX2,TRIP13
GO:0051726	regulation of cell cycle	17	1129	4.71e-11	ENSP00000166345,ENSP00000209728,ENSP00000216911,ENSP00000217026,ENSP00000262300,ENSP00000300403,ENSP00000301633,ENSP00000312995,ENSP00000320147,ENSP00000335357,ENSP00000342307,ENSP00000345571,ENSP00000356319,ENSP00000360944,ENSP00000378356,ENSP00000405726,ENSP00000415430	AURKA,BIRC5,CDC45,CDC6,CDKN3,CLSPN,E2F1,EZH2,FOXM1,GTSE1,KIF14,KIF20A,MYBL2,PKMYT1,STIL,TPX2,TRIP13
GO:1901990	regulation of mitotic cell cycle phase transition	11	351	9.08e-10	ENSP00000166345,ENSP00000209728,ENSP00000216911,ENSP00000300403,ENSP00000301633,ENSP00000312995,ENSP00000320147,ENSP00000345571,ENSP00000356319,ENSP00000405726,ENSP00000415430	AURKA,BIRC5,CDC45,CDC6,CLSPN,E2F1,EZH2,GTSE1,KIF14,TPX2,TRIP13
GO:0007059	chromosome segregation	10	253	9.5e-10	ENSP00000166345,ENSP00000240423,ENSP00000251496,ENSP00000286398,ENSP00000301633,ENSP00000325017,ENSP00000349961,ENSP00000356319,ENSP00000363524,ENSP00000414109	BIRC5,HJURP,KIF14,KIF4A,NCAPD2,NCAPG,NCAPH,SMC2,SMC4,TRIP13
GO:0044772	mitotic cell cycle phase transition	10	254	9.5e-10	ENSP00000209728,ENSP00000216911,ENSP00000219097,ENSP00000262300,ENSP00000301633,ENSP00000307288,ENSP00000335357,ENSP00000342307,ENSP00000345571,ENSP00000405726	AURKA,BIRC5,CDC45,CDC6,CDKN3,E2F1,FOXM1,MCM7,ORC6,PKMYT1
GO:0071103	DNA conformation change	10	257	9.5e-10	ENSP00000240423,ENSP00000251496,ENSP00000263382,ENSP00000286398,ENSP00000307288,ENSP00000325017,ENSP00000336868,ENSP00000349961,ENSP00000405726,ENSP00000414109	ASF1B,CDC45,CENPA,HJURP,MCM7,NCAPD2,NCAPG,NCAPH,SMC2,SMC4
GO:0051276	chromosome organization	15	999	1.25e-09	ENSP00000166345,ENSP00000216911,ENSP00000240423,ENSP00000251496,ENSP00000263382,ENSP00000286398,ENSP00000307288,ENSP00000320147,ENSP00000325017,ENSP00000336868,ENSP00000349961,ENSP00000356319,ENSP00000363524,ENSP00000405726,ENSP00000414109	ASF1B,AURKA,CDC45,CENPA,EZH2,HJURP,KIF14,KIF4A,MCM7,NCAPD2,NCAPG,NCAPH,SMC2,SMC4,TRIP13
GO:0007076	mitotic chromosome condensation	5	15	8.44e-09	ENSP00000240423,ENSP00000251496,ENSP00000286398,ENSP00000325017,ENSP00000349961	NCAPD2,NCAPG,NCAPH,SMC2,SMC4
GO:0007346	regulation of mitotic cell cycle	12	608	9.3e-09	ENSP00000166345,ENSP00000209728,ENSP00000216911,ENSP00000262300,ENSP00000300403,ENSP00000301633,ENSP00000312995,ENSP00000320147,ENSP00000345571,ENSP00000356319,ENSP00000405726,ENSP00000415430	AURKA,BIRC5,CDC45,CDC6,CLSPN,E2F1,EZH2,GTSE1,KIF14,PKMYT1,TPX2,TRIP13
GO:1902850	microtubule cytoskeleton organization involved in mitosis	7	94	1.51e-08	ENSP00000216911,ENSP00000217026,ENSP00000300403,ENSP00000301633,ENSP00000336868,ENSP00000360944,ENSP00000363524	AURKA,BIRC5,CENPA,KIF4A,MYBL2,STIL,TPX2
GO:0000070	mitotic sister chromatid segregation	7	101	2.32e-08	ENSP00000240423,ENSP00000251496,ENSP00000286398,ENSP00000325017,ENSP00000349961,ENSP00000356319,ENSP00000363524	KIF14,KIF4A,NCAPD2,NCAPG,NCAPH,SMC2,SMC4
GO:0010032	meiotic chromosome condensation	4	5	3.84e-08	ENSP00000240423,ENSP00000286398,ENSP00000325017,ENSP00000349961	NCAPD2,NCAPH,SMC2,SMC4
GO:0006996	organelle organization	21	3131	4.38e-08	ENSP00000166345,ENSP00000216911,ENSP00000217026,ENSP00000240423,ENSP00000251496,ENSP00000263382,ENSP00000286398,ENSP00000300403,ENSP00000301633,ENSP00000307288,ENSP00000320147,ENSP00000325017,ENSP00000336868,ENSP00000345571,ENSP00000349961,ENSP00000356319,ENSP00000360944,ENSP00000363524,ENSP00000378356,ENSP00000405726,ENSP00000414109	ASF1B,AURKA,BIRC5,CDC45,CENPA,E2F1,EZH2,HJURP,KIF14,KIF20A,KIF4A,MCM7,MYBL2,NCAPD2,NCAPG,NCAPH,SMC2,SMC4,STIL,TPX2,TRIP13
GO:0000075	cell cycle checkpoint	8	193	5e-08	ENSP00000166345,ENSP00000209728,ENSP00000216911,ENSP00000301633,ENSP00000312995,ENSP00000345571,ENSP00000405726,ENSP00000415430	AURKA,BIRC5,CDC45,CDC6,CLSPN,E2F1,GTSE1,TRIP13
GO:0006323	DNA packaging	8	195	5.19e-08	ENSP00000240423,ENSP00000251496,ENSP00000263382,ENSP00000286398,ENSP00000325017,ENSP00000336868,ENSP00000349961,ENSP00000414109	ASF1B,CENPA,HJURP,NCAPD2,NCAPG,NCAPH,SMC2,SMC4
GO:0098813	nuclear chromosome segregation	8	196	5.19e-08	ENSP00000166345,ENSP00000240423,ENSP00000251496,ENSP00000286398,ENSP00000325017,ENSP00000349961,ENSP00000356319,ENSP00000363524	KIF14,KIF4A,NCAPD2,NCAPG,NCAPH,SMC2,SMC4,TRIP13
GO:0007052	mitotic spindle organization	6	70	1.02e-07	ENSP00000216911,ENSP00000217026,ENSP00000300403,ENSP00000301633,ENSP00000360944,ENSP00000363524	AURKA,BIRC5,KIF4A,MYBL2,STIL,TPX2
GO:2000045	regulation of G1/S transition of mitotic cell cycle	7	148	2.05e-07	ENSP00000209728,ENSP00000216911,ENSP00000320147,ENSP00000345571,ENSP00000356319,ENSP00000405726,ENSP00000415430	AURKA,CDC45,CDC6,E2F1,EZH2,GTSE1,KIF14
GO:0045786	negative regulation of cell cycle	10	517	3.14e-07	ENSP00000166345,ENSP00000209728,ENSP00000216911,ENSP00000301633,ENSP00000312995,ENSP00000320147,ENSP00000335357,ENSP00000345571,ENSP00000405726,ENSP00000415430	AURKA,BIRC5,CDC45,CDC6,CDKN3,CLSPN,E2F1,EZH2,GTSE1,TRIP13
GO:1901991	negative regulation of mitotic cell cycle phase transition	7	160	3.22e-07	ENSP00000166345,ENSP00000216911,ENSP00000301633,ENSP00000312995,ENSP00000320147,ENSP00000345571,ENSP00000415430	AURKA,BIRC5,CLSPN,E2F1,EZH2,GTSE1,TRIP13
GO:0007017	microtubule-based process	10	605	1.2e-06	ENSP00000216911,ENSP00000217026,ENSP00000300403,ENSP00000301633,ENSP00000336868,ENSP00000356319,ENSP00000360944,ENSP00000363524,ENSP00000378356,ENSP00000415430	AURKA,BIRC5,CENPA,GTSE1,KIF14,KIF20A,KIF4A,MYBL2,STIL,TPX2
GO:0000082	G1/S transition of mitotic cell cycle	6	123	1.95e-06	ENSP00000209728,ENSP00000219097,ENSP00000307288,ENSP00000335357,ENSP00000345571,ENSP00000405726	CDC45,CDC6,CDKN3,E2F1,MCM7,ORC6
GO:0070192	chromosome organization involved in meiotic cell cycle	5	67	3.3e-06	ENSP00000166345,ENSP00000240423,ENSP00000286398,ENSP00000325017,ENSP00000349961	NCAPD2,NCAPH,SMC2,SMC4,TRIP13
GO:0051225	spindle assembly	5	70	3.96e-06	ENSP00000216911,ENSP00000217026,ENSP00000300403,ENSP00000301633,ENSP00000363524	AURKA,BIRC5,KIF4A,MYBL2,TPX2
GO:0031570	DNA integrity checkpoint	6	147	4.6e-06	ENSP00000209728,ENSP00000216911,ENSP00000312995,ENSP00000345571,ENSP00000405726,ENSP00000415430	AURKA,CDC45,CDC6,CLSPN,E2F1,GTSE1
GO:0007093	mitotic cell cycle checkpoint	6	153	5.64e-06	ENSP00000166345,ENSP00000216911,ENSP00000301633,ENSP00000312995,ENSP00000345571,ENSP00000415430	AURKA,BIRC5,CLSPN,E2F1,GTSE1,TRIP13
GO:0000226	microtubule cytoskeleton organization	8	393	5.84e-06	ENSP00000216911,ENSP00000217026,ENSP00000300403,ENSP00000301633,ENSP00000336868,ENSP00000360944,ENSP00000363524,ENSP00000378356	AURKA,BIRC5,CENPA,KIF20A,KIF4A,MYBL2,STIL,TPX2
GO:0006974	cellular response to DNA damage stimulus	10	749	6.63e-06	ENSP00000166345,ENSP00000216911,ENSP00000221486,ENSP00000307288,ENSP00000312995,ENSP00000342307,ENSP00000345571,ENSP00000356243,ENSP00000405726,ENSP00000415430	AURKA,CDC45,CLSPN,E2F1,FOXM1,GTSE1,MCM7,RNASEH2A,TRIP13,UBE2T
GO:1903046	meiotic cell cycle process	6	161	7.04e-06	ENSP00000166345,ENSP00000216911,ENSP00000240423,ENSP00000286398,ENSP00000325017,ENSP00000349961	AURKA,NCAPD2,NCAPH,SMC2,SMC4,TRIP13
GO:0006270	DNA replication initiation	4	31	7.24e-06	ENSP00000209728,ENSP00000219097,ENSP00000307288,ENSP00000405726	CDC45,CDC6,MCM7,ORC6
GO:0090068	positive regulation of cell cycle process	7	273	7.39e-06	ENSP00000209728,ENSP00000216911,ENSP00000301633,ENSP00000345571,ENSP00000356319,ENSP00000405726,ENSP00000415430	AURKA,BIRC5,CDC45,CDC6,E2F1,GTSE1,KIF14
GO:0006259	DNA metabolic process	10	773	7.94e-06	ENSP00000166345,ENSP00000209728,ENSP00000219097,ENSP00000221486,ENSP00000307288,ENSP00000312995,ENSP00000320147,ENSP00000342307,ENSP00000356243,ENSP00000405726	CDC45,CDC6,CLSPN,EZH2,FOXM1,MCM7,ORC6,RNASEH2A,TRIP13,UBE2T
GO:0090307	mitotic spindle assembly	4	40	1.71e-05	ENSP00000217026,ENSP00000300403,ENSP00000301633,ENSP00000363524	BIRC5,KIF4A,MYBL2,TPX2
GO:0006260	DNA replication	6	203	2.32e-05	ENSP00000209728,ENSP00000219097,ENSP00000221486,ENSP00000307288,ENSP00000312995,ENSP00000405726	CDC45,CDC6,CLSPN,MCM7,ORC6,RNASEH2A
GO:0016043	cellular component organization	22	5163	2.92e-05	ENSP00000166345,ENSP00000215743,ENSP00000216911,ENSP00000217026,ENSP00000240423,ENSP00000251496,ENSP00000263382,ENSP00000286398,ENSP00000300403,ENSP00000301633,ENSP00000307288,ENSP00000320147,ENSP00000325017,ENSP00000336868,ENSP00000345571,ENSP00000349961,ENSP00000356319,ENSP00000360944,ENSP00000363524,ENSP00000378356,ENSP00000405726,ENSP00000414109	ASF1B,AURKA,BIRC5,CDC45,CENPA,E2F1,EZH2,HJURP,KIF14,KIF20A,KIF4A,MCM7,MMP11,MYBL2,NCAPD2,NCAPG,NCAPH,SMC2,SMC4,STIL,TPX2,TRIP13
GO:0006261	DNA-dependent DNA replication	5	114	2.94e-05	ENSP00000209728,ENSP00000219097,ENSP00000221486,ENSP00000307288,ENSP00000405726	CDC45,CDC6,MCM7,ORC6,RNASEH2A
GO:0000281	mitotic cytokinesis	4	50	3.59e-05	ENSP00000301633,ENSP00000336868,ENSP00000363524,ENSP00000378356	BIRC5,CENPA,KIF20A,KIF4A
GO:0000076	DNA replication checkpoint	3	16	7.1e-05	ENSP00000209728,ENSP00000312995,ENSP00000405726	CDC45,CDC6,CLSPN
GO:0051383	kinetochore organization	3	17	8.2e-05	ENSP00000286398,ENSP00000336868,ENSP00000349961	CENPA,SMC2,SMC4
GO:0140013	meiotic nuclear division	5	146	8.34e-05	ENSP00000166345,ENSP00000216911,ENSP00000240423,ENSP00000286398,ENSP00000349961	AURKA,NCAPH,SMC2,SMC4,TRIP13
GO:0007088	regulation of mitotic nuclear division	5	160	0.00012	ENSP00000166345,ENSP00000209728,ENSP00000216911,ENSP00000262300,ENSP00000301633	AURKA,BIRC5,CDC6,PKMYT1,TRIP13
GO:1902749	regulation of cell cycle G2/M phase transition	5	167	0.00015	ENSP00000216911,ENSP00000300403,ENSP00000312995,ENSP00000356319,ENSP00000415430	AURKA,CLSPN,GTSE1,KIF14,TPX2
GO:0030330	DNA damage response, signal transduction by p53 class mediator	4	82	0.0002	ENSP00000216911,ENSP00000342307,ENSP00000345571,ENSP00000415430	AURKA,E2F1,FOXM1,GTSE1
GO:0051302	regulation of cell division	5	179	0.0002	ENSP00000209728,ENSP00000216911,ENSP00000219097,ENSP00000356319,ENSP00000378356	AURKA,CDC6,KIF14,KIF20A,ORC6
GO:0032465	regulation of cytokinesis	4	84	0.00021	ENSP00000209728,ENSP00000216911,ENSP00000356319,ENSP00000378356	AURKA,CDC6,KIF14,KIF20A
GO:0045132	meiotic chromosome segregation	4	85	0.00022	ENSP00000166345,ENSP00000240423,ENSP00000286398,ENSP00000349961	NCAPH,SMC2,SMC4,TRIP13
GO:0007143	female meiotic nuclear division	3	28	0.00027	ENSP00000166345,ENSP00000216911,ENSP00000240423	AURKA,NCAPH,TRIP13
GO:0000083	regulation of transcription involved in G1/S transition of mitotic cell cycle	3	29	0.00029	ENSP00000209728,ENSP00000345571,ENSP00000405726	CDC45,CDC6,E2F1
GO:2000134	negative regulation of G1/S transition of mitotic cell cycle	4	97	0.00034	ENSP00000216911,ENSP00000320147,ENSP00000345571,ENSP00000415430	AURKA,E2F1,EZH2,GTSE1
GO:0033554	cellular response to stress	11	1553	0.0004	ENSP00000166345,ENSP00000216911,ENSP00000221486,ENSP00000307288,ENSP00000312995,ENSP00000320147,ENSP00000342307,ENSP00000345571,ENSP00000356243,ENSP00000405726,ENSP00000415430	AURKA,CDC45,CLSPN,E2F1,EZH2,FOXM1,GTSE1,MCM7,RNASEH2A,TRIP13,UBE2T
GO:0044773	mitotic DNA damage checkpoint	4	102	0.0004	ENSP00000216911,ENSP00000312995,ENSP00000345571,ENSP00000415430	AURKA,CLSPN,E2F1,GTSE1
GO:0071156	regulation of cell cycle arrest	4	111	0.00052	ENSP00000216911,ENSP00000342307,ENSP00000345571,ENSP00000415430	AURKA,E2F1,FOXM1,GTSE1
GO:0051128	regulation of cellular component organization	13	2306	0.00063	ENSP00000166345,ENSP00000209728,ENSP00000216911,ENSP00000262300,ENSP00000300403,ENSP00000301633,ENSP00000320147,ENSP00000342307,ENSP00000345571,ENSP00000356319,ENSP00000360944,ENSP00000405726,ENSP00000414109	AURKA,BIRC5,CDC45,CDC6,E2F1,EZH2,FOXM1,HJURP,KIF14,PKMYT1,STIL,TPX2,TRIP13
GO:0000086	G2/M transition of mitotic cell cycle	4	123	0.00074	ENSP00000216911,ENSP00000262300,ENSP00000301633,ENSP00000342307	AURKA,BIRC5,FOXM1,PKMYT1
GO:0009987	cellular process	33	14652	0.00087	ENSP00000005286,ENSP00000166345,ENSP00000209728,ENSP00000215743,ENSP00000216911,ENSP00000217026,ENSP00000219097,ENSP00000221486,ENSP00000240423,ENSP00000251496,ENSP00000262300,ENSP00000263382,ENSP00000286398,ENSP00000300403,ENSP00000301633,ENSP00000307288,ENSP00000312995,ENSP00000320147,ENSP00000325017,ENSP00000335357,ENSP00000336868,ENSP00000342307,ENSP00000345571,ENSP00000349961,ENSP00000356243…	ASF1B,AURKA,BIRC5,CDC45,CDC6,CDCA3,CDKN3,CENPA,CLSPN,E2F1,EZH2,FOXM1,GTSE1,HJURP,KIF14,KIF20A,KIF4A,MCM7,MMP11,MYBL2,NCAPD2,NCAPG,NCAPH,ORC6,PKMYT1,RNASEH2A,SMC2,SMC4,STIL,TMEM132A,TPX2,TRIP13,UBE2T
GO:0007144	female meiosis I	2	7	0.0011	ENSP00000166345,ENSP00000216911	AURKA,TRIP13
GO:0030071	regulation of mitotic metaphase/anaphase transition	3	49	0.0011	ENSP00000166345,ENSP00000209728,ENSP00000301633	BIRC5,CDC6,TRIP13
GO:0033043	regulation of organelle organization	9	1155	0.0011	ENSP00000166345,ENSP00000209728,ENSP00000216911,ENSP00000262300,ENSP00000300403,ENSP00000301633,ENSP00000345571,ENSP00000360944,ENSP00000405726	AURKA,BIRC5,CDC45,CDC6,E2F1,PKMYT1,STIL,TPX2,TRIP13
GO:0045931	positive regulation of mitotic cell cycle	4	144	0.0012	ENSP00000209728,ENSP00000216911,ENSP00000301633,ENSP00000405726	AURKA,BIRC5,CDC45,CDC6
GO:0006336	DNA replication-independent nucleosome assembly	3	53	0.0013	ENSP00000263382,ENSP00000336868,ENSP00000414109	ASF1B,CENPA,HJURP
GO:0010389	regulation of G2/M transition of mitotic cell cycle	4	149	0.0013	ENSP00000216911,ENSP00000300403,ENSP00000312995,ENSP00000356319	AURKA,CLSPN,KIF14,TPX2
GO:0006281	DNA repair	6	491	0.0016	ENSP00000166345,ENSP00000221486,ENSP00000312995,ENSP00000342307,ENSP00000356243,ENSP00000405726	CDC45,CLSPN,FOXM1,RNASEH2A,TRIP13,UBE2T
GO:0006977	DNA damage response, signal transduction by p53 class mediator resulting in cell cycle arrest	3	59	0.0016	ENSP00000216911,ENSP00000345571,ENSP00000415430	AURKA,E2F1,GTSE1
GO:1901992	positive regulation of mitotic cell cycle phase transition	3	65	0.0019	ENSP00000209728,ENSP00000301633,ENSP00000405726	BIRC5,CDC45,CDC6
GO:0045859	regulation of protein kinase activity	7	788	0.0027	ENSP00000209728,ENSP00000262300,ENSP00000300403,ENSP00000312995,ENSP00000320147,ENSP00000335357,ENSP00000356319	CDC6,CDKN3,CLSPN,EZH2,KIF14,PKMYT1,TPX2
GO:0000079	regulation of cyclin-dependent protein serine/threonine kinase activity	3	86	0.0039	ENSP00000209728,ENSP00000262300,ENSP00000335357	CDC6,CDKN3,PKMYT1
GO:0042325	regulation of phosphorylation	9	1465	0.0047	ENSP00000209728,ENSP00000262300,ENSP00000300403,ENSP00000307288,ENSP00000312995,ENSP00000320147,ENSP00000335357,ENSP00000342307,ENSP00000356319	CDC6,CDKN3,CLSPN,EZH2,FOXM1,KIF14,MCM7,PKMYT1,TPX2
GO:0065004	protein-DNA complex assembly	4	223	0.0047	ENSP00000263382,ENSP00000336868,ENSP00000405726,ENSP00000414109	ASF1B,CDC45,CENPA,HJURP
GO:0071539	protein localization to centrosome	2	20	0.0052	ENSP00000216911,ENSP00000360944	AURKA,STIL
GO:1903429	regulation of cell maturation	2	20	0.0052	ENSP00000216911,ENSP00000356319	AURKA,KIF14
GO:0007094	mitotic spindle assembly checkpoint	2	21	0.0055	ENSP00000166345,ENSP00000301633	BIRC5,TRIP13
GO:0070925	organelle assembly	6	666	0.0063	ENSP00000216911,ENSP00000217026,ENSP00000300403,ENSP00000301633,ENSP00000336868,ENSP00000363524	AURKA,BIRC5,CENPA,KIF4A,MYBL2,TPX2
GO:0051781	positive regulation of cell division	3	107	0.0064	ENSP00000209728,ENSP00000216911,ENSP00000356319	AURKA,CDC6,KIF14
GO:0051304	chromosome separation	2	25	0.007	ENSP00000240423,ENSP00000325017	NCAPD2,NCAPH
GO:0044260	cellular macromolecule metabolic process	20	6413	0.0071	ENSP00000005286,ENSP00000166345,ENSP00000209728,ENSP00000216911,ENSP00000217026,ENSP00000219097,ENSP00000221486,ENSP00000262300,ENSP00000263382,ENSP00000301633,ENSP00000307288,ENSP00000312995,ENSP00000320147,ENSP00000335357,ENSP00000342307,ENSP00000345571,ENSP00000356243,ENSP00000356319,ENSP00000405726,ENSP00000442068	ASF1B,AURKA,BIRC5,CDC45,CDC6,CDCA3,CDKN3,CLSPN,E2F1,EZH2,FOXM1,KIF14,MCM7,MYBL2,ORC6,PKMYT1,RNASEH2A,TMEM132A,TRIP13,UBE2T
GO:0048523	negative regulation of cellular process	16	4454	0.0077	ENSP00000166345,ENSP00000209728,ENSP00000215743,ENSP00000216911,ENSP00000219097,ENSP00000262300,ENSP00000301633,ENSP00000312995,ENSP00000320147,ENSP00000335357,ENSP00000342307,ENSP00000345571,ENSP00000356319,ENSP00000360944,ENSP00000405726,ENSP00000415430	AURKA,BIRC5,CDC45,CDC6,CDKN3,CLSPN,E2F1,EZH2,FOXM1,GTSE1,KIF14,MMP11,ORC6,PKMYT1,STIL,TRIP13
GO:1900087	positive regulation of G1/S transition of mitotic cell cycle	2	28	0.0083	ENSP00000209728,ENSP00000405726	CDC45,CDC6
GO:0022414	reproductive process	8	1350	0.0104	ENSP00000166345,ENSP00000216911,ENSP00000240423,ENSP00000263382,ENSP00000286398,ENSP00000325017,ENSP00000345571,ENSP00000349961	ASF1B,AURKA,E2F1,NCAPD2,NCAPH,SMC2,SMC4,TRIP13
GO:0001932	regulation of protein phosphorylation	8	1370	0.0112	ENSP00000209728,ENSP00000262300,ENSP00000300403,ENSP00000312995,ENSP00000320147,ENSP00000335357,ENSP00000342307,ENSP00000356319	CDC6,CDKN3,CLSPN,EZH2,FOXM1,KIF14,PKMYT1,TPX2
GO:0045860	positive regulation of protein kinase activity	5	517	0.0112	ENSP00000209728,ENSP00000300403,ENSP00000312995,ENSP00000320147,ENSP00000356319	CDC6,CLSPN,EZH2,KIF14,TPX2
GO:0097421	liver regeneration	2	34	0.0112	ENSP00000216911,ENSP00000320147	AURKA,EZH2
GO:0033044	regulation of chromosome organization	4	313	0.0124	ENSP00000166345,ENSP00000209728,ENSP00000301633,ENSP00000405726	BIRC5,CDC45,CDC6,TRIP13
GO:0032467	positive regulation of cytokinesis	2	38	0.0133	ENSP00000209728,ENSP00000356319	CDC6,KIF14
GO:0070317	negative regulation of G0 to G1 transition	2	40	0.0144	ENSP00000320147,ENSP00000345571	E2F1,EZH2
GO:0034080	CENP-A containing nucleosome assembly	2	42	0.0155	ENSP00000336868,ENSP00000414109	CENPA,HJURP
GO:0043170	macromolecule metabolic process	21	7453	0.0162	ENSP00000005286,ENSP00000166345,ENSP00000209728,ENSP00000215743,ENSP00000216911,ENSP00000217026,ENSP00000219097,ENSP00000221486,ENSP00000262300,ENSP00000263382,ENSP00000301633,ENSP00000307288,ENSP00000312995,ENSP00000320147,ENSP00000335357,ENSP00000342307,ENSP00000345571,ENSP00000356243,ENSP00000356319,ENSP00000405726,ENSP00000442068	ASF1B,AURKA,BIRC5,CDC45,CDC6,CDCA3,CDKN3,CLSPN,E2F1,EZH2,FOXM1,KIF14,MCM7,MMP11,MYBL2,ORC6,PKMYT1,RNASEH2A,TMEM132A,TRIP13,UBE2T
GO:0010972	negative regulation of G2/M transition of mitotic cell cycle	2	44	0.0167	ENSP00000216911,ENSP00000312995	AURKA,CLSPN
GO:0045599	negative regulation of fat cell differentiation	2	46	0.0178	ENSP00000215743,ENSP00000345571	E2F1,MMP11
GO:0090304	nucleic acid metabolic process	14	3941	0.0179	ENSP00000166345,ENSP00000209728,ENSP00000217026,ENSP00000219097,ENSP00000221486,ENSP00000263382,ENSP00000301633,ENSP00000307288,ENSP00000312995,ENSP00000320147,ENSP00000342307,ENSP00000345571,ENSP00000356243,ENSP00000405726	ASF1B,BIRC5,CDC45,CDC6,CLSPN,E2F1,EZH2,FOXM1,MCM7,MYBL2,ORC6,RNASEH2A,TRIP13,UBE2T
GO:0034645	cellular macromolecule biosynthetic process	13	3518	0.0189	ENSP00000166345,ENSP00000209728,ENSP00000217026,ENSP00000219097,ENSP00000221486,ENSP00000263382,ENSP00000301633,ENSP00000307288,ENSP00000312995,ENSP00000320147,ENSP00000342307,ENSP00000345571,ENSP00000405726	ASF1B,BIRC5,CDC45,CDC6,CLSPN,E2F1,EZH2,FOXM1,MCM7,MYBL2,ORC6,RNASEH2A,TRIP13
GO:0021695	cerebellar cortex development	2	49	0.0193	ENSP00000320147,ENSP00000356319	EZH2,KIF14
GO:0030900	forebrain development	4	366	0.0193	ENSP00000320147,ENSP00000345571,ENSP00000356319,ENSP00000360944	E2F1,EZH2,KIF14,STIL
GO:0070507	regulation of microtubule cytoskeleton organization	3	177	0.0195	ENSP00000216911,ENSP00000300403,ENSP00000360944	AURKA,STIL,TPX2
GO:0032508	DNA duplex unwinding	2	53	0.0217	ENSP00000307288,ENSP00000405726	CDC45,MCM7
GO:0007276	gamete generation	5	632	0.0222	ENSP00000166345,ENSP00000216911,ENSP00000240423,ENSP00000263382,ENSP00000345571	ASF1B,AURKA,E2F1,NCAPH,TRIP13
GO:0045840	positive regulation of mitotic nuclear division	2	54	0.0222	ENSP00000216911,ENSP00000301633	AURKA,BIRC5
GO:0048146	positive regulation of fibroblast proliferation	2	54	0.0222	ENSP00000209728,ENSP00000345571	CDC6,E2F1
GO:0022607	cellular component assembly	10	2343	0.0227	ENSP00000166345,ENSP00000216911,ENSP00000217026,ENSP00000263382,ENSP00000300403,ENSP00000301633,ENSP00000336868,ENSP00000363524,ENSP00000405726,ENSP00000414109	ASF1B,AURKA,BIRC5,CDC45,CENPA,HJURP,KIF4A,MYBL2,TPX2,TRIP13
GO:0034502	protein localization to chromosome	2	58	0.0246	ENSP00000320147,ENSP00000336868	CENPA,EZH2
GO:0046605	regulation of centrosome cycle	2	59	0.0253	ENSP00000216911,ENSP00000360944	AURKA,STIL
GO:0006325	chromatin organization	5	683	0.0289	ENSP00000216911,ENSP00000263382,ENSP00000320147,ENSP00000336868,ENSP00000414109	ASF1B,AURKA,CENPA,EZH2,HJURP
GO:0065009	regulation of molecular function	12	3322	0.0313	ENSP00000209728,ENSP00000216911,ENSP00000240423,ENSP00000262300,ENSP00000300403,ENSP00000301633,ENSP00000312995,ENSP00000320147,ENSP00000335357,ENSP00000345571,ENSP00000356319,ENSP00000414109	AURKA,BIRC5,CDC6,CDKN3,CLSPN,E2F1,EZH2,HJURP,KIF14,NCAPH,PKMYT1,TPX2
GO:0032268	regulation of cellular protein metabolic process	10	2486	0.0327	ENSP00000209728,ENSP00000216911,ENSP00000262300,ENSP00000300403,ENSP00000301633,ENSP00000312995,ENSP00000320147,ENSP00000335357,ENSP00000342307,ENSP00000356319	AURKA,BIRC5,CDC6,CDKN3,CLSPN,EZH2,FOXM1,KIF14,PKMYT1,TPX2
GO:0051303	establishment of chromosome localization	2	72	0.0354	ENSP00000301633,ENSP00000356319	BIRC5,KIF14
GO:0021766	hippocampus development	2	75	0.0376	ENSP00000320147,ENSP00000356319	EZH2,KIF14
GO:0007098	centrosome cycle	2	78	0.0401	ENSP00000216911,ENSP00000360944	AURKA,STIL
GO:0071900	regulation of protein serine/threonine kinase activity	4	488	0.0443	ENSP00000209728,ENSP00000262300,ENSP00000320147,ENSP00000335357	CDC6,CDKN3,EZH2,PKMYT1
GO:0009798	axis specification	2	89	0.0494	ENSP00000216911,ENSP00000360944	AURKA,STIL
GO:0050790	regulation of catalytic activity	9	2249	0.0496	ENSP00000209728,ENSP00000240423,ENSP00000262300,ENSP00000300403,ENSP00000301633,ENSP00000312995,ENSP00000320147,ENSP00000335357,ENSP00000356319	BIRC5,CDC6,CDKN3,CLSPN,EZH2,KIF14,NCAPH,PKMYT1,TPX2

## Sheet: Molecular Function (GO)
#term ID	term description	observed gene count	background gene count	false discovery rate	matching proteins in your network (IDs)	matching proteins in your network (labels)
GO:0005524	ATP binding	12	1462	0.00043	ENSP00000166345,ENSP00000209728,ENSP00000216911,ENSP00000262300,ENSP00000286398,ENSP00000300403,ENSP00000307288,ENSP00000349961,ENSP00000356243,ENSP00000356319,ENSP00000363524,ENSP00000378356	AURKA,CDC6,KIF14,KIF20A,KIF4A,MCM7,PKMYT1,SMC2,SMC4,TPX2,TRIP13,UBE2T
GO:0097159	organic cyclic compound binding	22	5382	0.00043	ENSP00000166345,ENSP00000209728,ENSP00000216911,ENSP00000217026,ENSP00000219097,ENSP00000221486,ENSP00000262300,ENSP00000286398,ENSP00000300403,ENSP00000307288,ENSP00000312995,ENSP00000320147,ENSP00000336868,ENSP00000342307,ENSP00000345571,ENSP00000349961,ENSP00000356243,ENSP00000356319,ENSP00000363524,ENSP00000378356,ENSP00000405726,ENSP00000414109	AURKA,CDC45,CDC6,CENPA,CLSPN,E2F1,EZH2,FOXM1,HJURP,KIF14,KIF20A,KIF4A,MCM7,MYBL2,ORC6,PKMYT1,RNASEH2A,SMC2,SMC4,TPX2,TRIP13,UBE2T
GO:1901363	heterocyclic compound binding	22	5305	0.00043	ENSP00000166345,ENSP00000209728,ENSP00000216911,ENSP00000217026,ENSP00000219097,ENSP00000221486,ENSP00000262300,ENSP00000286398,ENSP00000300403,ENSP00000307288,ENSP00000312995,ENSP00000320147,ENSP00000336868,ENSP00000342307,ENSP00000345571,ENSP00000349961,ENSP00000356243,ENSP00000356319,ENSP00000363524,ENSP00000378356,ENSP00000405726,ENSP00000414109	AURKA,CDC45,CDC6,CENPA,CLSPN,E2F1,EZH2,FOXM1,HJURP,KIF14,KIF20A,KIF4A,MCM7,MYBL2,ORC6,PKMYT1,RNASEH2A,SMC2,SMC4,TPX2,TRIP13,UBE2T
GO:0003697	single-stranded DNA binding	4	99	0.00056	ENSP00000286398,ENSP00000307288,ENSP00000349961,ENSP00000405726	CDC45,MCM7,SMC2,SMC4
GO:0003677	DNA binding	13	2457	0.0013	ENSP00000217026,ENSP00000219097,ENSP00000286398,ENSP00000307288,ENSP00000312995,ENSP00000320147,ENSP00000336868,ENSP00000342307,ENSP00000345571,ENSP00000349961,ENSP00000363524,ENSP00000405726,ENSP00000414109	CDC45,CENPA,CLSPN,E2F1,EZH2,FOXM1,HJURP,KIF4A,MCM7,MYBL2,ORC6,SMC2,SMC4
GO:0019900	kinase binding	7	678	0.0014	ENSP00000209728,ENSP00000216911,ENSP00000300403,ENSP00000342307,ENSP00000345571,ENSP00000356319,ENSP00000378356	AURKA,CDC6,E2F1,FOXM1,KIF14,KIF20A,TPX2
GO:0003682	chromatin binding	6	501	0.0018	ENSP00000240423,ENSP00000320147,ENSP00000325017,ENSP00000336868,ENSP00000356243,ENSP00000405726	CDC45,CENPA,EZH2,NCAPD2,NCAPH,UBE2T
GO:0003688	DNA replication origin binding	2	14	0.0031	ENSP00000219097,ENSP00000405726	CDC45,ORC6
GO:0008574	ATP-dependent microtubule motor activity, plus-end-directed	2	16	0.0037	ENSP00000356319,ENSP00000363524	KIF14,KIF4A
GO:0019901	protein kinase binding	6	599	0.0037	ENSP00000216911,ENSP00000300403,ENSP00000342307,ENSP00000345571,ENSP00000356319,ENSP00000378356	AURKA,E2F1,FOXM1,KIF14,KIF20A,TPX2
GO:0003676	nucleic acid binding	14	3332	0.0043	ENSP00000217026,ENSP00000219097,ENSP00000221486,ENSP00000286398,ENSP00000307288,ENSP00000312995,ENSP00000320147,ENSP00000336868,ENSP00000342307,ENSP00000345571,ENSP00000349961,ENSP00000363524,ENSP00000405726,ENSP00000414109	CDC45,CENPA,CLSPN,E2F1,EZH2,FOXM1,HJURP,KIF4A,MCM7,MYBL2,ORC6,RNASEH2A,SMC2,SMC4
GO:0003777	microtubule motor activity	3	110	0.0065	ENSP00000356319,ENSP00000363524,ENSP00000378356	KIF14,KIF20A,KIF4A
GO:0008017	microtubule binding	4	253	0.0065	ENSP00000301633,ENSP00000356319,ENSP00000363524,ENSP00000378356	BIRC5,KIF14,KIF20A,KIF4A
GO:1990837	sequence-specific double-stranded DNA binding	6	747	0.0094	ENSP00000217026,ENSP00000219097,ENSP00000320147,ENSP00000342307,ENSP00000345571,ENSP00000405726	CDC45,E2F1,EZH2,FOXM1,MYBL2,ORC6
GO:0046982	protein heterodimerization activity	5	519	0.01	ENSP00000216911,ENSP00000286398,ENSP00000301633,ENSP00000336868,ENSP00000349961	AURKA,BIRC5,CENPA,SMC2,SMC4
GO:0003678	DNA helicase activity	2	41	0.0135	ENSP00000307288,ENSP00000405726	CDC45,MCM7
GO:0019899	enzyme binding	10	2197	0.0137	ENSP00000209728,ENSP00000216911,ENSP00000240423,ENSP00000300403,ENSP00000301633,ENSP00000342307,ENSP00000345571,ENSP00000356243,ENSP00000356319,ENSP00000378356	AURKA,BIRC5,CDC6,E2F1,FOXM1,KIF14,KIF20A,NCAPH,TPX2,UBE2T
GO:0042393	histone binding	3	188	0.02	ENSP00000263382,ENSP00000325017,ENSP00000414109	ASF1B,HJURP,NCAPD2
GO:0005515	protein binding	19	6605	0.0208	ENSP00000166345,ENSP00000209728,ENSP00000216911,ENSP00000217026,ENSP00000240423,ENSP00000263382,ENSP00000286398,ENSP00000300403,ENSP00000301633,ENSP00000325017,ENSP00000336868,ENSP00000342307,ENSP00000345571,ENSP00000349961,ENSP00000356243,ENSP00000356319,ENSP00000363524,ENSP00000378356,ENSP00000414109	ASF1B,AURKA,BIRC5,CDC6,CENPA,E2F1,FOXM1,HJURP,KIF14,KIF20A,KIF4A,MYBL2,NCAPD2,NCAPH,SMC2,SMC4,TPX2,TRIP13,UBE2T
GO:0005488	binding	27	11878	0.0381	ENSP00000166345,ENSP00000209728,ENSP00000215743,ENSP00000216911,ENSP00000217026,ENSP00000219097,ENSP00000221486,ENSP00000240423,ENSP00000262300,ENSP00000263382,ENSP00000286398,ENSP00000300403,ENSP00000301633,ENSP00000307288,ENSP00000312995,ENSP00000320147,ENSP00000325017,ENSP00000336868,ENSP00000342307,ENSP00000345571,ENSP00000349961,ENSP00000356243,ENSP00000356319,ENSP00000363524,ENSP00000378356…	ASF1B,AURKA,BIRC5,CDC45,CDC6,CENPA,CLSPN,E2F1,EZH2,FOXM1,HJURP,KIF14,KIF20A,KIF4A,MCM7,MMP11,MYBL2,NCAPD2,NCAPH,ORC6,PKMYT1,RNASEH2A,SMC2,SMC4,TPX2,TRIP13,UBE2T
GO:0017111	nucleoside-triphosphatase activity	5	778	0.0421	ENSP00000307288,ENSP00000356319,ENSP00000363524,ENSP00000378356,ENSP00000405726	CDC45,KIF14,KIF20A,KIF4A,MCM7
GO:0031490	chromatin DNA binding	2	87	0.0428	ENSP00000320147,ENSP00000336868	CENPA,EZH2

## Sheet: Cellular Component (GO)
#term ID	term description	observed gene count	background gene count	false discovery rate	matching proteins in your network (IDs)	matching proteins in your network (labels)
GO:0005694	chromosome	17	950	4.81e-12	ENSP00000216911,ENSP00000217026,ENSP00000219097,ENSP00000240423,ENSP00000251496,ENSP00000263382,ENSP00000286398,ENSP00000301633,ENSP00000307288,ENSP00000320147,ENSP00000325017,ENSP00000336868,ENSP00000345571,ENSP00000349961,ENSP00000363524,ENSP00000405726,ENSP00000414109	ASF1B,AURKA,BIRC5,CDC45,CENPA,E2F1,EZH2,HJURP,KIF4A,MCM7,MYBL2,NCAPD2,NCAPG,NCAPH,ORC6,SMC2,SMC4
GO:0044427	chromosomal part	16	819	4.96e-12	ENSP00000216911,ENSP00000217026,ENSP00000219097,ENSP00000240423,ENSP00000251496,ENSP00000263382,ENSP00000286398,ENSP00000301633,ENSP00000307288,ENSP00000320147,ENSP00000325017,ENSP00000336868,ENSP00000345571,ENSP00000349961,ENSP00000405726,ENSP00000414109	ASF1B,AURKA,BIRC5,CDC45,CENPA,E2F1,EZH2,HJURP,MCM7,MYBL2,NCAPD2,NCAPG,NCAPH,ORC6,SMC2,SMC4
GO:0000796	condensin complex	5	7	3.37e-10	ENSP00000240423,ENSP00000251496,ENSP00000286398,ENSP00000325017,ENSP00000349961	NCAPD2,NCAPG,NCAPH,SMC2,SMC4
GO:0005654	nucleoplasm	24	3446	3.37e-10	ENSP00000209728,ENSP00000216911,ENSP00000217026,ENSP00000219097,ENSP00000221486,ENSP00000262300,ENSP00000263382,ENSP00000286398,ENSP00000300403,ENSP00000301633,ENSP00000307288,ENSP00000312995,ENSP00000320147,ENSP00000325017,ENSP00000336868,ENSP00000342307,ENSP00000345571,ENSP00000349961,ENSP00000356243,ENSP00000363524,ENSP00000378356,ENSP00000405726,ENSP00000414109,ENSP00000415430	ASF1B,AURKA,BIRC5,CDC45,CDC6,CENPA,CLSPN,E2F1,EZH2,FOXM1,GTSE1,HJURP,KIF20A,KIF4A,MCM7,MYBL2,NCAPD2,ORC6,PKMYT1,RNASEH2A,SMC2,SMC4,TPX2,UBE2T
GO:0031981	nuclear lumen	25	4030	5e-10	ENSP00000209728,ENSP00000216911,ENSP00000217026,ENSP00000219097,ENSP00000221486,ENSP00000240423,ENSP00000262300,ENSP00000263382,ENSP00000286398,ENSP00000300403,ENSP00000301633,ENSP00000307288,ENSP00000312995,ENSP00000320147,ENSP00000325017,ENSP00000336868,ENSP00000342307,ENSP00000345571,ENSP00000349961,ENSP00000356243,ENSP00000363524,ENSP00000378356,ENSP00000405726,ENSP00000414109,ENSP00000415430	ASF1B,AURKA,BIRC5,CDC45,CDC6,CENPA,CLSPN,E2F1,EZH2,FOXM1,GTSE1,HJURP,KIF20A,KIF4A,MCM7,MYBL2,NCAPD2,NCAPH,ORC6,PKMYT1,RNASEH2A,SMC2,SMC4,TPX2,UBE2T
GO:0043232	intracellular non-membrane-bounded organelle	25	4005	5e-10	ENSP00000209728,ENSP00000216911,ENSP00000217026,ENSP00000219097,ENSP00000240423,ENSP00000251496,ENSP00000262300,ENSP00000263382,ENSP00000286398,ENSP00000300403,ENSP00000301633,ENSP00000307288,ENSP00000320147,ENSP00000325017,ENSP00000336868,ENSP00000345571,ENSP00000349961,ENSP00000356243,ENSP00000356319,ENSP00000360944,ENSP00000363524,ENSP00000378356,ENSP00000405726,ENSP00000414109,ENSP00000415430	ASF1B,AURKA,BIRC5,CDC45,CDC6,CENPA,E2F1,EZH2,GTSE1,HJURP,KIF14,KIF20A,KIF4A,MCM7,MYBL2,NCAPD2,NCAPG,NCAPH,ORC6,PKMYT1,SMC2,SMC4,STIL,TPX2,UBE2T
GO:0070013	intracellular organelle lumen	27	5162	9.72e-10	ENSP00000005286,ENSP00000209728,ENSP00000215743,ENSP00000216911,ENSP00000217026,ENSP00000219097,ENSP00000221486,ENSP00000240423,ENSP00000262300,ENSP00000263382,ENSP00000286398,ENSP00000300403,ENSP00000301633,ENSP00000307288,ENSP00000312995,ENSP00000320147,ENSP00000325017,ENSP00000336868,ENSP00000342307,ENSP00000345571,ENSP00000349961,ENSP00000356243,ENSP00000363524,ENSP00000378356,ENSP00000405726…	ASF1B,AURKA,BIRC5,CDC45,CDC6,CENPA,CLSPN,E2F1,EZH2,FOXM1,GTSE1,HJURP,KIF20A,KIF4A,MCM7,MMP11,MYBL2,NCAPD2,NCAPH,ORC6,PKMYT1,RNASEH2A,SMC2,SMC4,TMEM132A,TPX2,UBE2T
GO:0000793	condensed chromosome	9	215	1.28e-09	ENSP00000216911,ENSP00000240423,ENSP00000251496,ENSP00000286398,ENSP00000301633,ENSP00000325017,ENSP00000336868,ENSP00000349961,ENSP00000414109	AURKA,BIRC5,CENPA,HJURP,NCAPD2,NCAPG,NCAPH,SMC2,SMC4
GO:0000228	nuclear chromosome	11	514	6.58e-09	ENSP00000216911,ENSP00000219097,ENSP00000240423,ENSP00000263382,ENSP00000286398,ENSP00000301633,ENSP00000320147,ENSP00000325017,ENSP00000336868,ENSP00000345571,ENSP00000405726	ASF1B,AURKA,BIRC5,CDC45,CENPA,E2F1,EZH2,NCAPD2,NCAPH,ORC6,SMC2
GO:0005634	nucleus	29	6892	6.79e-09	ENSP00000166345,ENSP00000209728,ENSP00000216911,ENSP00000217026,ENSP00000219097,ENSP00000221486,ENSP00000240423,ENSP00000251496,ENSP00000262300,ENSP00000263382,ENSP00000286398,ENSP00000300403,ENSP00000301633,ENSP00000307288,ENSP00000312995,ENSP00000320147,ENSP00000325017,ENSP00000335357,ENSP00000336868,ENSP00000342307,ENSP00000345571,ENSP00000349961,ENSP00000356243,ENSP00000356319,ENSP00000363524…	ASF1B,AURKA,BIRC5,CDC45,CDC6,CDKN3,CENPA,CLSPN,E2F1,EZH2,FOXM1,GTSE1,HJURP,KIF14,KIF20A,KIF4A,MCM7,MYBL2,NCAPD2,NCAPG,NCAPH,ORC6,PKMYT1,RNASEH2A,SMC2,SMC4,TPX2,TRIP13,UBE2T
GO:0044815	DNA packaging complex	6	113	4.67e-07	ENSP00000240423,ENSP00000251496,ENSP00000286398,ENSP00000325017,ENSP00000336868,ENSP00000349961	CENPA,NCAPD2,NCAPG,NCAPH,SMC2,SMC4
GO:0000779	condensed chromosome, centromeric region	6	117	5.19e-07	ENSP00000216911,ENSP00000251496,ENSP00000301633,ENSP00000325017,ENSP00000336868,ENSP00000414109	AURKA,BIRC5,CENPA,HJURP,NCAPD2,NCAPG
GO:0044446	intracellular organelle part	30	8882	5.19e-07	ENSP00000005286,ENSP00000209728,ENSP00000215743,ENSP00000216911,ENSP00000217026,ENSP00000219097,ENSP00000221486,ENSP00000240423,ENSP00000251496,ENSP00000262300,ENSP00000263382,ENSP00000286398,ENSP00000300403,ENSP00000301633,ENSP00000307288,ENSP00000312995,ENSP00000320147,ENSP00000325017,ENSP00000336868,ENSP00000342307,ENSP00000345571,ENSP00000349961,ENSP00000356243,ENSP00000356319,ENSP00000360944…	ASF1B,AURKA,BIRC5,CDC45,CDC6,CENPA,CLSPN,E2F1,EZH2,FOXM1,GTSE1,HJURP,KIF14,KIF20A,KIF4A,MCM7,MMP11,MYBL2,NCAPD2,NCAPG,NCAPH,ORC6,PKMYT1,RNASEH2A,SMC2,SMC4,STIL,TMEM132A,TPX2,UBE2T
GO:0044454	nuclear chromosome part	9	480	7.18e-07	ENSP00000216911,ENSP00000219097,ENSP00000240423,ENSP00000263382,ENSP00000320147,ENSP00000325017,ENSP00000336868,ENSP00000345571,ENSP00000405726	ASF1B,AURKA,CDC45,CENPA,E2F1,EZH2,NCAPD2,NCAPH,ORC6
GO:0043231	intracellular membrane-bounded organelle	31	10365	2.93e-06	ENSP00000005286,ENSP00000166345,ENSP00000209728,ENSP00000215743,ENSP00000216911,ENSP00000217026,ENSP00000219097,ENSP00000221486,ENSP00000240423,ENSP00000251496,ENSP00000262300,ENSP00000263382,ENSP00000286398,ENSP00000300403,ENSP00000301633,ENSP00000307288,ENSP00000312995,ENSP00000320147,ENSP00000325017,ENSP00000335357,ENSP00000336868,ENSP00000342307,ENSP00000345571,ENSP00000349961,ENSP00000356243…	ASF1B,AURKA,BIRC5,CDC45,CDC6,CDKN3,CENPA,CLSPN,E2F1,EZH2,FOXM1,GTSE1,HJURP,KIF14,KIF20A,KIF4A,MCM7,MMP11,MYBL2,NCAPD2,NCAPG,NCAPH,ORC6,PKMYT1,RNASEH2A,SMC2,SMC4,TMEM132A,TPX2,TRIP13,UBE2T
GO:0005819	spindle	7	322	7.71e-06	ENSP00000209728,ENSP00000216911,ENSP00000300403,ENSP00000301633,ENSP00000356319,ENSP00000363524,ENSP00000378356	AURKA,BIRC5,CDC6,KIF14,KIF20A,KIF4A,TPX2
GO:0015630	microtubule cytoskeleton	11	1118	9.41e-06	ENSP00000209728,ENSP00000216911,ENSP00000300403,ENSP00000301633,ENSP00000345571,ENSP00000356319,ENSP00000360944,ENSP00000363524,ENSP00000378356,ENSP00000405726,ENSP00000415430	AURKA,BIRC5,CDC45,CDC6,E2F1,GTSE1,KIF14,KIF20A,KIF4A,STIL,TPX2
GO:0005874	microtubule	7	385	2.26e-05	ENSP00000216911,ENSP00000300403,ENSP00000301633,ENSP00000356319,ENSP00000363524,ENSP00000378356,ENSP00000415430	AURKA,BIRC5,GTSE1,KIF14,KIF20A,KIF4A,TPX2
GO:0043229	intracellular organelle	32	12193	2.33e-05	ENSP00000005286,ENSP00000166345,ENSP00000209728,ENSP00000215743,ENSP00000216911,ENSP00000217026,ENSP00000219097,ENSP00000221486,ENSP00000240423,ENSP00000251496,ENSP00000262300,ENSP00000263382,ENSP00000286398,ENSP00000300403,ENSP00000301633,ENSP00000307288,ENSP00000312995,ENSP00000320147,ENSP00000325017,ENSP00000335357,ENSP00000336868,ENSP00000342307,ENSP00000345571,ENSP00000349961,ENSP00000356243…	ASF1B,AURKA,BIRC5,CDC45,CDC6,CDKN3,CENPA,CLSPN,E2F1,EZH2,FOXM1,GTSE1,HJURP,KIF14,KIF20A,KIF4A,MCM7,MMP11,MYBL2,NCAPD2,NCAPG,NCAPH,ORC6,PKMYT1,RNASEH2A,SMC2,SMC4,STIL,TMEM132A,TPX2,TRIP13,UBE2T
GO:0005875	microtubule associated complex	5	144	2.88e-05	ENSP00000216911,ENSP00000301633,ENSP00000356319,ENSP00000363524,ENSP00000378356	AURKA,BIRC5,KIF14,KIF20A,KIF4A
GO:0030496	midbody	5	165	4.93e-05	ENSP00000216911,ENSP00000301633,ENSP00000356319,ENSP00000363524,ENSP00000378356	AURKA,BIRC5,KIF14,KIF20A,KIF4A
GO:0032991	protein-containing complex	20	4792	6.02e-05	ENSP00000216911,ENSP00000217026,ENSP00000219097,ENSP00000221486,ENSP00000240423,ENSP00000251496,ENSP00000263382,ENSP00000286398,ENSP00000301633,ENSP00000307288,ENSP00000320147,ENSP00000325017,ENSP00000336868,ENSP00000345571,ENSP00000349961,ENSP00000356319,ENSP00000363524,ENSP00000378356,ENSP00000405726,ENSP00000414109	ASF1B,AURKA,BIRC5,CDC45,CENPA,E2F1,EZH2,HJURP,KIF14,KIF20A,KIF4A,MCM7,MYBL2,NCAPD2,NCAPG,NCAPH,ORC6,RNASEH2A,SMC2,SMC4
GO:0044424	intracellular part	33	13996	8.19e-05	ENSP00000005286,ENSP00000166345,ENSP00000209728,ENSP00000215743,ENSP00000216911,ENSP00000217026,ENSP00000219097,ENSP00000221486,ENSP00000240423,ENSP00000251496,ENSP00000262300,ENSP00000263382,ENSP00000286398,ENSP00000300403,ENSP00000301633,ENSP00000307288,ENSP00000312995,ENSP00000320147,ENSP00000325017,ENSP00000335357,ENSP00000336868,ENSP00000342307,ENSP00000345571,ENSP00000349961,ENSP00000356243…	ASF1B,AURKA,BIRC5,CDC45,CDC6,CDCA3,CDKN3,CENPA,CLSPN,E2F1,EZH2,FOXM1,GTSE1,HJURP,KIF14,KIF20A,KIF4A,MCM7,MMP11,MYBL2,NCAPD2,NCAPG,NCAPH,ORC6,PKMYT1,RNASEH2A,SMC2,SMC4,STIL,TMEM132A,TPX2,TRIP13,UBE2T
GO:0005829	cytosol	20	4958	9.74e-05	ENSP00000209728,ENSP00000216911,ENSP00000221486,ENSP00000240423,ENSP00000251496,ENSP00000262300,ENSP00000286398,ENSP00000300403,ENSP00000301633,ENSP00000307288,ENSP00000325017,ENSP00000335357,ENSP00000336868,ENSP00000349961,ENSP00000356319,ENSP00000360944,ENSP00000363524,ENSP00000414109,ENSP00000415430,ENSP00000442068	AURKA,BIRC5,CDC6,CDCA3,CDKN3,CENPA,GTSE1,HJURP,KIF14,KIF4A,MCM7,NCAPD2,NCAPG,NCAPH,PKMYT1,RNASEH2A,SMC2,SMC4,STIL,TPX2
GO:0000794	condensed nuclear chromosome	4	96	0.00011	ENSP00000216911,ENSP00000240423,ENSP00000325017,ENSP00000336868	AURKA,CENPA,NCAPD2,NCAPH
GO:0000799	nuclear condensin complex	2	3	0.00012	ENSP00000240423,ENSP00000325017	NCAPD2,NCAPH
GO:0051233	spindle midzone	3	31	0.00012	ENSP00000209728,ENSP00000216911,ENSP00000356319	AURKA,CDC6,KIF14
GO:0044430	cytoskeletal part	11	1547	0.00013	ENSP00000209728,ENSP00000216911,ENSP00000300403,ENSP00000301633,ENSP00000345571,ENSP00000356319,ENSP00000360944,ENSP00000363524,ENSP00000378356,ENSP00000405726,ENSP00000415430	AURKA,BIRC5,CDC45,CDC6,E2F1,GTSE1,KIF14,KIF20A,KIF4A,STIL,TPX2
GO:0032133	chromosome passenger complex	2	5	0.00024	ENSP00000216911,ENSP00000301633	AURKA,BIRC5
GO:0005871	kinesin complex	3	52	0.00043	ENSP00000356319,ENSP00000363524,ENSP00000378356	KIF14,KIF20A,KIF4A
GO:0043203	axon hillock	2	8	0.00048	ENSP00000216911,ENSP00000300403	AURKA,TPX2
GO:0045171	intercellular bridge	3	57	0.00053	ENSP00000300403,ENSP00000363524,ENSP00000378356	KIF20A,KIF4A,TPX2
GO:0045120	pronucleus	2	17	0.0017	ENSP00000216911,ENSP00000320147	AURKA,EZH2
GO:0043073	germ cell nucleus	2	19	0.002	ENSP00000166345,ENSP00000216911	AURKA,TRIP13
GO:0000780	condensed nuclear chromosome, centromeric region	2	22	0.0024	ENSP00000216911,ENSP00000336868	AURKA,CENPA
GO:0000777	condensed chromosome kinetochore	3	104	0.0025	ENSP00000301633,ENSP00000336868,ENSP00000414109	BIRC5,CENPA,HJURP
GO:0005737	cytoplasm	28	11238	0.0025	ENSP00000005286,ENSP00000209728,ENSP00000215743,ENSP00000216911,ENSP00000221486,ENSP00000240423,ENSP00000251496,ENSP00000262300,ENSP00000286398,ENSP00000300403,ENSP00000301633,ENSP00000307288,ENSP00000312995,ENSP00000320147,ENSP00000325017,ENSP00000335357,ENSP00000336868,ENSP00000345571,ENSP00000349961,ENSP00000356243,ENSP00000356319,ENSP00000360944,ENSP00000363524,ENSP00000378356,ENSP00000405726…	AURKA,BIRC5,CDC45,CDC6,CDCA3,CDKN3,CENPA,CLSPN,E2F1,EZH2,GTSE1,HJURP,KIF14,KIF20A,KIF4A,MCM7,MMP11,NCAPD2,NCAPG,NCAPH,PKMYT1,RNASEH2A,SMC2,SMC4,STIL,TMEM132A,TPX2,UBE2T
GO:0005815	microtubule organizing center	6	683	0.0028	ENSP00000216911,ENSP00000300403,ENSP00000301633,ENSP00000345571,ENSP00000360944,ENSP00000405726	AURKA,BIRC5,CDC45,E2F1,STIL,TPX2
GO:0044444	cytoplasmic part	25	9377	0.0032	ENSP00000005286,ENSP00000209728,ENSP00000215743,ENSP00000216911,ENSP00000221486,ENSP00000240423,ENSP00000251496,ENSP00000262300,ENSP00000286398,ENSP00000300403,ENSP00000301633,ENSP00000307288,ENSP00000312995,ENSP00000325017,ENSP00000335357,ENSP00000336868,ENSP00000345571,ENSP00000349961,ENSP00000356319,ENSP00000360944,ENSP00000363524,ENSP00000378356,ENSP00000414109,ENSP00000415430,ENSP00000442068	AURKA,BIRC5,CDC6,CDCA3,CDKN3,CENPA,CLSPN,E2F1,GTSE1,HJURP,KIF14,KIF20A,KIF4A,MCM7,MMP11,NCAPD2,NCAPG,NCAPH,PKMYT1,RNASEH2A,SMC2,SMC4,STIL,TMEM132A,TPX2
GO:0005814	centriole	3	125	0.0038	ENSP00000216911,ENSP00000301633,ENSP00000360944	AURKA,BIRC5,STIL
GO:0000785	chromatin	5	489	0.0039	ENSP00000263382,ENSP00000307288,ENSP00000320147,ENSP00000336868,ENSP00000345571	ASF1B,CENPA,E2F1,EZH2,MCM7
GO:0000922	spindle pole	3	150	0.0061	ENSP00000209728,ENSP00000216911,ENSP00000300403	AURKA,CDC6,TPX2
GO:0000790	nuclear chromatin	4	333	0.0064	ENSP00000263382,ENSP00000320147,ENSP00000336868,ENSP00000345571	ASF1B,CENPA,E2F1,EZH2
GO:0005876	spindle microtubule	2	47	0.008	ENSP00000301633,ENSP00000363524	BIRC5,KIF4A
GO:0005881	cytoplasmic microtubule	2	50	0.0089	ENSP00000301633,ENSP00000415430	BIRC5,GTSE1
GO:0005813	centrosome	4	468	0.0197	ENSP00000216911,ENSP00000345571,ENSP00000360944,ENSP00000405726	AURKA,CDC45,E2F1,STIL
GO:0072686	mitotic spindle	2	87	0.0244	ENSP00000216911,ENSP00000300403	AURKA,TPX2
GO:0005730	nucleolus	5	926	0.046	ENSP00000219097,ENSP00000262300,ENSP00000286398,ENSP00000356243,ENSP00000414109	HJURP,ORC6,PKMYT1,SMC2,UBE2T
GO:0033267	axon part	3	341	0.0478	ENSP00000216911,ENSP00000300403,ENSP00000363524	AURKA,KIF4A,TPX2

## Sheet: Reference publications
#term ID	term description	observed gene count	background gene count	false discovery rate	matching proteins in your network (IDs)	matching proteins in your network (labels)
PMID:22962576	(2012) Identification of pro-inflammatory cytokines associated with muscle invasive bladder cancer; the roles of IL-5, IL-20, and IL-28A.	14	198	2.32e-15	ENSP00000219097,ENSP00000251496,ENSP00000262300,ENSP00000300403,ENSP00000301633,ENSP00000307288,ENSP00000349961,ENSP00000356319,ENSP00000360944,ENSP00000363524,ENSP00000378356,ENSP00000405726,ENSP00000415430,ENSP00000442068	BIRC5,CDC45,CDCA3,GTSE1,KIF14,KIF20A,KIF4A,MCM7,NCAPG,ORC6,PKMYT1,SMC4,STIL,TPX2
PMID:25808367	(2015) Cell cycle gene expression networks discovered using systems biology: Significance in carcinogenesis.	12	89	2.32e-15	ENSP00000166345,ENSP00000216911,ENSP00000240423,ENSP00000301633,ENSP00000307288,ENSP00000312995,ENSP00000320147,ENSP00000336868,ENSP00000342307,ENSP00000405726,ENSP00000414109,ENSP00000442068	AURKA,BIRC5,CDC45,CDCA3,CENPA,CLSPN,EZH2,FOXM1,HJURP,MCM7,NCAPH,TRIP13
PMID:28387377	(2017) Novel miRNA-mRNA interactions conserved in essential cancer pathways.	10	34	2.32e-15	ENSP00000216911,ENSP00000240423,ENSP00000251496,ENSP00000262300,ENSP00000301633,ENSP00000307288,ENSP00000312995,ENSP00000320147,ENSP00000378356,ENSP00000414109	AURKA,BIRC5,CLSPN,EZH2,HJURP,KIF20A,MCM7,NCAPG,NCAPH,PKMYT1
PMID:23468608	(2013) Biomolecular events in cancer revealed by attractor metagenes.	11	75	1.07e-14	ENSP00000215743,ENSP00000216911,ENSP00000217026,ENSP00000240423,ENSP00000300403,ENSP00000301633,ENSP00000336868,ENSP00000342307,ENSP00000345571,ENSP00000378356,ENSP00000414109	AURKA,BIRC5,CENPA,E2F1,FOXM1,HJURP,KIF20A,MMP11,MYBL2,NCAPH,TPX2
PMID:22956898	(2012) Weighted frequent gene co-expression network mining to identify genes involved in genome stability.	9	29	4.16e-14	ENSP00000219097,ENSP00000263382,ENSP00000300403,ENSP00000336868,ENSP00000356319,ENSP00000363524,ENSP00000378356,ENSP00000415430,ENSP00000442068	ASF1B,CDCA3,CENPA,GTSE1,KIF14,KIF20A,KIF4A,ORC6,TPX2
PMID:23620736	(2013) The expression of glyceraldehyde-3-phosphate dehydrogenase associated cell cycle (GACC) genes correlates with cancer stage and poor survival in patients with solid tumors.	9	32	7.43e-14	ENSP00000300403,ENSP00000301633,ENSP00000325017,ENSP00000335357,ENSP00000336868,ENSP00000342307,ENSP00000363524,ENSP00000405726,ENSP00000442068	BIRC5,CDC45,CDCA3,CDKN3,CENPA,FOXM1,KIF4A,NCAPD2,TPX2
PMID:29467813	(2018) Subunits of human condensins are potential therapeutic targets for cancers.	8	28	4.33e-12	ENSP00000216911,ENSP00000240423,ENSP00000251496,ENSP00000286398,ENSP00000325017,ENSP00000336868,ENSP00000363524,ENSP00000414109	AURKA,CENPA,HJURP,KIF4A,NCAPD2,NCAPG,NCAPH,SMC2
PMID:20940121	(2010) Bagged gene shaving for the robust clustering of high-throughput data.	9	61	1e-11	ENSP00000166345,ENSP00000209728,ENSP00000240423,ENSP00000336868,ENSP00000356319,ENSP00000363524,ENSP00000378356,ENSP00000405726,ENSP00000442068	CDC45,CDC6,CDCA3,CENPA,KIF14,KIF20A,KIF4A,NCAPH,TRIP13
PMID:24109597	(2013) Identification of cell cycle-regulated genes periodically expressed in U2OS cells and their regulation by FOXM1 and E2F transcription factors.	10	107	1.43e-11	ENSP00000209728,ENSP00000216911,ENSP00000217026,ENSP00000301633,ENSP00000312995,ENSP00000336868,ENSP00000345571,ENSP00000363524,ENSP00000405726,ENSP00000414109	AURKA,BIRC5,CDC45,CDC6,CENPA,CLSPN,E2F1,HJURP,KIF4A,MYBL2
PMID:26292924	(2015) Large-scale RNA-Seq Transcriptome Analysis of 4043 Cancers and 548 Normal Tissue Controls across 12 TCGA Cancer Types.	9	66	1.44e-11	ENSP00000209728,ENSP00000216911,ENSP00000301633,ENSP00000320147,ENSP00000335357,ENSP00000342307,ENSP00000363524,ENSP00000378356,ENSP00000414109	AURKA,BIRC5,CDC6,CDKN3,EZH2,FOXM1,HJURP,KIF20A,KIF4A
PMID:27368372	(2016) Genome co-amplification upregulates a mitotic gene network activity that predicts outcome and response to mitotic protein inhibitors in breast cancer.	8	35	1.44e-11	ENSP00000240423,ENSP00000251496,ENSP00000325017,ENSP00000342307,ENSP00000349961,ENSP00000356319,ENSP00000414109,ENSP00000415430	FOXM1,GTSE1,HJURP,KIF14,NCAPD2,NCAPG,NCAPH,SMC4
PMID:21712546	(2011) Quantitative phosphoproteomics identifies substrates and functional modules of Aurora and Polo-like kinase activities in mitotic cells.	9	69	1.86e-11	ENSP00000216911,ENSP00000240423,ENSP00000251496,ENSP00000300403,ENSP00000307288,ENSP00000325017,ENSP00000356319,ENSP00000363524,ENSP00000378356	AURKA,KIF14,KIF20A,KIF4A,MCM7,NCAPD2,NCAPG,NCAPH,TPX2
PMID:29435157	(2018) The microtubule-associated protein PRC1 is a potential therapeutic target for lung cancer.	7	23	1.19e-10	ENSP00000217026,ENSP00000301633,ENSP00000335357,ENSP00000342307,ENSP00000356319,ENSP00000363524,ENSP00000378356	BIRC5,CDKN3,FOXM1,KIF14,KIF20A,KIF4A,MYBL2
PMID:17335918	(2007) Cell cycle regulation in Trypanosoma brucei.	8	51	1.54e-10	ENSP00000209728,ENSP00000307288,ENSP00000325017,ENSP00000335357,ENSP00000336868,ENSP00000349961,ENSP00000405726,ENSP00000442068	CDC45,CDC6,CDCA3,CDKN3,CENPA,MCM7,NCAPD2,SMC4
PMID:24866763	(2014) Integration of mRNA expression profile, copy number alterations, and microRNA expression levels in breast cancer to improve grade definition.	9	96	2.37e-10	ENSP00000217026,ENSP00000251496,ENSP00000263382,ENSP00000300403,ENSP00000301633,ENSP00000307288,ENSP00000325017,ENSP00000336868,ENSP00000342307	ASF1B,BIRC5,CENPA,FOXM1,MCM7,MYBL2,NCAPD2,NCAPG,TPX2
PMID:16919171	(2006) On the statistical assessment of classifiers using DNA microarray data.	8	73	1.91e-09	ENSP00000216911,ENSP00000240423,ENSP00000251496,ENSP00000286398,ENSP00000325017,ENSP00000342307,ENSP00000349961,ENSP00000363524	AURKA,FOXM1,KIF4A,NCAPD2,NCAPG,NCAPH,SMC2,SMC4
PMID:26234682	(2016) The EGF receptor ligand amphiregulin controls cell division via FoxM1.	7	39	2.34e-09	ENSP00000216911,ENSP00000217026,ENSP00000301633,ENSP00000336868,ENSP00000342307,ENSP00000345571,ENSP00000378356	AURKA,BIRC5,CENPA,E2F1,FOXM1,KIF20A,MYBL2
PMID:25501812	(2015) The NuRD nucleosome remodelling complex and NHK-1 kinase are required for chromosome condensation in oocytes.	6	17	3.04e-09	ENSP00000240423,ENSP00000251496,ENSP00000286398,ENSP00000325017,ENSP00000349961,ENSP00000363524	KIF4A,NCAPD2,NCAPG,NCAPH,SMC2,SMC4
PMID:28122328	(2017) Genome-wide screen identifies a novel prognostic signature for breast cancer survival.	7	41	3.04e-09	ENSP00000215743,ENSP00000216911,ENSP00000221486,ENSP00000301633,ENSP00000307288,ENSP00000320147,ENSP00000356243	AURKA,BIRC5,EZH2,MCM7,MMP11,RNASEH2A,UBE2T
PMID:26900477	(2016) A robust prognostic gene expression signature for early stage lung adenocarcinoma.	6	18	3.72e-09	ENSP00000251496,ENSP00000300403,ENSP00000325017,ENSP00000342307,ENSP00000363524,ENSP00000378356	FOXM1,KIF20A,KIF4A,NCAPD2,NCAPG,TPX2
PMID:29387216	(2018) Bioinformatics analysis of RNA sequencing data reveals multiple key genes in uterine corpus endometrial carcinoma.	6	18	3.72e-09	ENSP00000217026,ENSP00000240423,ENSP00000251496,ENSP00000300403,ENSP00000301633,ENSP00000320147	BIRC5,EZH2,MYBL2,NCAPG,NCAPH,TPX2
PMID:27231315	(2016) Proteomics Analysis with a Nano Random Forest Approach Reveals Novel Functional Interactions Regulated by SMC Complexes on Mitotic Chromosomes.	8	92	7.87e-09	ENSP00000240423,ENSP00000325017,ENSP00000336868,ENSP00000349961,ENSP00000363524,ENSP00000378356,ENSP00000405726,ENSP00000415430	CDC45,CENPA,GTSE1,KIF20A,KIF4A,NCAPD2,NCAPH,SMC4
PMID:22452920	(2012) Identifying microRNAmRNA dysregulations in ovarian cancer.	7	51	9.59e-09	ENSP00000216911,ENSP00000240423,ENSP00000251496,ENSP00000300403,ENSP00000301633,ENSP00000336868,ENSP00000414109	AURKA,BIRC5,CENPA,HJURP,NCAPG,NCAPH,TPX2
PMID:28099485	(2017) Cell-Based Systems Biology Analysis of Human AS03-Adjuvanted H5N1 Avian Influenza Vaccine Responses: A Phase I Randomized Controlled Trial.	8	97	1.07e-08	ENSP00000209728,ENSP00000240423,ENSP00000300403,ENSP00000301633,ENSP00000345571,ENSP00000378356,ENSP00000405726,ENSP00000415430	BIRC5,CDC45,CDC6,E2F1,GTSE1,KIF20A,NCAPH,TPX2
PMID:28562334	(2017) Gene co-expression network reveals shared modules predictive of stage and grade in serous ovarian cancers.	6	24	1.3e-08	ENSP00000216911,ENSP00000300403,ENSP00000301633,ENSP00000336868,ENSP00000342307,ENSP00000363524	AURKA,BIRC5,CENPA,FOXM1,KIF4A,TPX2
PMID:23166350	(2012) Mitotic chromosomes are compacted laterally by KIF4 and condensin and axially by topoisomerase IIAlfa.	6	25	1.55e-08	ENSP00000240423,ENSP00000286398,ENSP00000325017,ENSP00000336868,ENSP00000349961,ENSP00000363524	CENPA,KIF4A,NCAPD2,NCAPH,SMC2,SMC4
PMID:26372731	(2015) A four gene signature predicts benefit from anthracyclines: evidence from the BR9601 and MA.5 clinical trials.	6	25	1.55e-08	ENSP00000209728,ENSP00000216911,ENSP00000300403,ENSP00000307288,ENSP00000342307,ENSP00000378356	AURKA,CDC6,FOXM1,KIF20A,MCM7,TPX2
PMID:26462736	(2015) Quantitative phosphoproteomics reveals new roles for the protein phosphatase PP6 in mitotic cells.	6	25	1.55e-08	ENSP00000216911,ENSP00000240423,ENSP00000251496,ENSP00000325017,ENSP00000349961,ENSP00000363524	AURKA,KIF4A,NCAPD2,NCAPG,NCAPH,SMC4
PMID:29122991	(2018) Maternal embryonic leucine zipper kinase is a novel target for proliferation-associated high-risk myeloma.	6	25	1.55e-08	ENSP00000216911,ENSP00000301633,ENSP00000320147,ENSP00000336868,ENSP00000342307,ENSP00000415430	AURKA,BIRC5,CENPA,EZH2,FOXM1,GTSE1
PMID:23060211	(2013) Identification of candidate downstream targets of TGFBeta signaling during palate development by genome-wide transcript profiling.	9	171	1.62e-08	ENSP00000166345,ENSP00000219097,ENSP00000301633,ENSP00000307288,ENSP00000312995,ENSP00000342307,ENSP00000363524,ENSP00000378356,ENSP00000405726	BIRC5,CDC45,CLSPN,FOXM1,KIF20A,KIF4A,MCM7,ORC6,TRIP13
PMID:26364928	(2015) KDM4JMJD2 Histone Demethylase Inhibitors Block Prostate Tumor Growth by Suppressing the Expression of AR and BMYB-Regulated Genes.	6	26	1.62e-08	ENSP00000216911,ENSP00000217026,ENSP00000300403,ENSP00000301633,ENSP00000336868,ENSP00000342307	AURKA,BIRC5,CENPA,FOXM1,MYBL2,TPX2
PMID:24400072	(2014) Gene expression profiles of human adipose tissue-derived mesenchymal stem cells are modified by cell culture density.	7	60	1.97e-08	ENSP00000216911,ENSP00000251496,ENSP00000300403,ENSP00000307288,ENSP00000342307,ENSP00000378356,ENSP00000405726	AURKA,CDC45,FOXM1,KIF20A,MCM7,NCAPG,TPX2
PMID:26975490	(2016) Clinically available RNA profiling tests of prostate tumors: utility and comparison.	7	61	2.13e-08	ENSP00000219097,ENSP00000263382,ENSP00000300403,ENSP00000301633,ENSP00000342307,ENSP00000378356,ENSP00000442068	ASF1B,BIRC5,CDCA3,FOXM1,KIF20A,ORC6,TPX2
PMID:28542306	(2017) Gene signature associated with benign neurofibroma transformation to malignant peripheral nerve sheath tumors.	7	61	2.13e-08	ENSP00000216911,ENSP00000263382,ENSP00000300403,ENSP00000301633,ENSP00000320147,ENSP00000342307,ENSP00000378356	ASF1B,AURKA,BIRC5,EZH2,FOXM1,KIF20A,TPX2
PMID:20864510	(2010) ANCCAATAD2 overexpression identifies breast cancer patients with poor prognosis, acting to drive proliferation and survival of triple-negative cells through control of B-Myb and EZH2.	6	32	4.29e-08	ENSP00000209728,ENSP00000217026,ENSP00000307288,ENSP00000320147,ENSP00000349961,ENSP00000363524	CDC6,EZH2,KIF4A,MCM7,MYBL2,SMC4
PMID:18684329	(2008) Pooling breast cancer datasets has a synergetic effect on classification performance and improves signature stability.	6	33	4.92e-08	ENSP00000217026,ENSP00000300403,ENSP00000336868,ENSP00000356319,ENSP00000363524,ENSP00000378356	CENPA,KIF14,KIF20A,KIF4A,MYBL2,TPX2
PMID:29125603	(2018) Cell cycle arrest through indirect transcriptional repression by p53: I have a DREAM.	7	73	6.14e-08	ENSP00000209728,ENSP00000217026,ENSP00000301633,ENSP00000320147,ENSP00000336868,ENSP00000342307,ENSP00000414109	BIRC5,CDC6,CENPA,EZH2,FOXM1,HJURP,MYBL2
PMID:22309699	(2012) Polo-like kinase 1 (Plk1): an Unexpected Player in DNA Replication.	6	35	6.41e-08	ENSP00000209728,ENSP00000219097,ENSP00000307288,ENSP00000312995,ENSP00000405726,ENSP00000415430	CDC45,CDC6,CLSPN,GTSE1,MCM7,ORC6
PMID:25936657	(2015) Gene expression profiling via bioinformatics analysis reveals biomarkers in laryngeal squamous cell carcinoma.	6	35	6.41e-08	ENSP00000216911,ENSP00000251496,ENSP00000301633,ENSP00000336868,ENSP00000356243,ENSP00000405726	AURKA,BIRC5,CDC45,CENPA,NCAPG,UBE2T
PMID:27140416	(2016) Conserved Senescence Associated Genes and Pathways in Primary Human Fibroblasts Detected by RNA-Seq.	7	75	6.78e-08	ENSP00000209728,ENSP00000221486,ENSP00000300403,ENSP00000342307,ENSP00000345571,ENSP00000356243,ENSP00000378356	CDC6,E2F1,FOXM1,KIF20A,RNASEH2A,TPX2,UBE2T
PMID:28300828	(2017) NCAPH plays important roles in human colon cancer.	5	13	8.13e-08	ENSP00000240423,ENSP00000251496,ENSP00000286398,ENSP00000325017,ENSP00000349961	NCAPD2,NCAPG,NCAPH,SMC2,SMC4
PMID:19753302	(2009) Global gene expression profiling of human pleural mesotheliomas: identification of matrix metalloproteinase 14 (MMP-14) as potential tumour target.	6	40	1.2e-07	ENSP00000215743,ENSP00000216911,ENSP00000240423,ENSP00000301633,ENSP00000356319,ENSP00000363524	AURKA,BIRC5,KIF14,KIF4A,MMP11,NCAPH
PMID:26334372	(2015) Exposure to fluorescent light triggers down regulation of genes involved with mitotic progression in Xiphophorus skin.	7	83	1.2e-07	ENSP00000216911,ENSP00000221486,ENSP00000251496,ENSP00000307288,ENSP00000356319,ENSP00000378356,ENSP00000405726	AURKA,CDC45,KIF14,KIF20A,MCM7,NCAPG,RNASEH2A
PMID:28424560	(2017) An exploratory study of host polymorphisms in genes that clinically characterize breast cancer tumors and pretreatment cognitive performance in breast cancer survivors.	6	40	1.2e-07	ENSP00000215743,ENSP00000216911,ENSP00000217026,ENSP00000219097,ENSP00000301633,ENSP00000336868	AURKA,BIRC5,CENPA,MMP11,MYBL2,ORC6
PMID:21858164	(2011) Condensin I recruitment to base damage-enriched DNA lesions is modulated by PARP1.	5	15	1.34e-07	ENSP00000240423,ENSP00000251496,ENSP00000286398,ENSP00000325017,ENSP00000349961	NCAPD2,NCAPG,NCAPH,SMC2,SMC4
PMID:21082037	(2010) Breast cancer biomarker discovery in the functional genomic age: a systematic review of 42 gene expression signatures.	6	42	1.43e-07	ENSP00000216911,ENSP00000300403,ENSP00000307288,ENSP00000336868,ENSP00000342307,ENSP00000378356	AURKA,CENPA,FOXM1,KIF20A,MCM7,TPX2
PMID:23228031	(2012) A network module-based method for identifying cancer prognostic signatures.	5	16	1.68e-07	ENSP00000216911,ENSP00000301633,ENSP00000325017,ENSP00000336868,ENSP00000378356	AURKA,BIRC5,CENPA,KIF20A,NCAPD2
PMID:25888889	(2015) Fuzzy logic selection as a new reliable tool to identify molecular grade signatures in breast cancer--the INNODIAG study.	5	16	1.68e-07	ENSP00000216911,ENSP00000301633,ENSP00000336868,ENSP00000342307,ENSP00000378356	AURKA,BIRC5,CENPA,FOXM1,KIF20A
PMID:26595675	(2015) Indirect p53-dependent transcriptional repression of Survivin, CDC25C, and PLK1 genes requires the cyclin-dependent kinase inhibitor p21CDKN1A and CDECHR promoter sites binding the DREAM complex.	6	48	2.81e-07	ENSP00000216911,ENSP00000217026,ENSP00000301633,ENSP00000335357,ENSP00000342307,ENSP00000378356	AURKA,BIRC5,CDKN3,FOXM1,KIF20A,MYBL2
PMID:19619298	(2009) Low expression of a few genes indicates good prognosis in estrogen receptor positive breast cancer.	5	19	3.28e-07	ENSP00000209728,ENSP00000216911,ENSP00000217026,ENSP00000301633,ENSP00000405726	AURKA,BIRC5,CDC45,CDC6,MYBL2
PMID:28789343	(2017) Identification of altered pathways in breast cancer based on individualized pathway aberrance score.	6	50	3.39e-07	ENSP00000217026,ENSP00000262300,ENSP00000336868,ENSP00000342307,ENSP00000363524,ENSP00000378356	CENPA,FOXM1,KIF20A,KIF4A,MYBL2,PKMYT1
PMID:19454010	(2009) In vitro nuclear interactome of the HIV-1 Tat protein.	7	103	4.23e-07	ENSP00000240423,ENSP00000251496,ENSP00000286398,ENSP00000307288,ENSP00000320147,ENSP00000325017,ENSP00000349961	EZH2,MCM7,NCAPD2,NCAPG,NCAPH,SMC2,SMC4
PMID:26871287	(2016) MicroRNA-34a promotes genomic instability by a broad suppression of genome maintenance mechanisms downstream of the oncogene KSHV-vGPCR.	6	53	4.51e-07	ENSP00000209728,ENSP00000251496,ENSP00000312995,ENSP00000325017,ENSP00000349961,ENSP00000405726	CDC45,CDC6,CLSPN,NCAPD2,NCAPG,SMC4
PMID:28317894	(2017) SWIM: a computational tool to unveiling crucial nodes in complex biological networks.	5	21	4.7e-07	ENSP00000216911,ENSP00000217026,ENSP00000301633,ENSP00000320147,ENSP00000342307	AURKA,BIRC5,EZH2,FOXM1,MYBL2
PMID:22750847	(2012) DDX5 regulates DNA replication and is required for cell proliferation in a subset of breast cancer cells.	6	54	4.82e-07	ENSP00000209728,ENSP00000219097,ENSP00000307288,ENSP00000335357,ENSP00000345571,ENSP00000405726	CDC45,CDC6,CDKN3,E2F1,MCM7,ORC6
PMID:26474389	(2015) Genome and transcriptome delineation of two major oncogenic pathways governing invasive ductal breast cancer development.	6	54	4.82e-07	ENSP00000216911,ENSP00000217026,ENSP00000219097,ENSP00000336868,ENSP00000356319,ENSP00000405726	AURKA,CDC45,CENPA,KIF14,MYBL2,ORC6
PMID:24096481	(2014) p53-dependent gene repression through p21 is mediated by recruitment of E2F4 repression complexes.	5	22	5.45e-07	ENSP00000209728,ENSP00000301633,ENSP00000320147,ENSP00000335357,ENSP00000345571	BIRC5,CDC6,CDKN3,E2F1,EZH2
PMID:26167883	(2015) A unique binding mode enables MCM2 to chaperone histones H3-H4 at replication forks.	5	22	5.45e-07	ENSP00000263382,ENSP00000307288,ENSP00000336868,ENSP00000405726,ENSP00000414109	ASF1B,CDC45,CENPA,HJURP,MCM7
PMID:24742402	(2014) Capturing the biological impact of CDKN2A and MC1R genes as an early predisposing event in melanoma and non melanoma skin cancer.	7	110	5.76e-07	ENSP00000209728,ENSP00000216911,ENSP00000251496,ENSP00000356243,ENSP00000363524,ENSP00000405726,ENSP00000442068	AURKA,CDC45,CDC6,CDCA3,KIF4A,NCAPG,UBE2T
PMID:18803232	(2009) Sustained NF-kappaB activation produces a short-term cell proliferation block in conjunction with repressing effectors of cell cycle progression controlled by E2F or FoxM1.	6	57	5.98e-07	ENSP00000209728,ENSP00000320147,ENSP00000335357,ENSP00000342307,ENSP00000345571,ENSP00000378356	CDC6,CDKN3,E2F1,EZH2,FOXM1,KIF20A
PMID:25999914	(2015) Transcriptional control of mitosis: deregulation and cancer.	6	58	6.48e-07	ENSP00000209728,ENSP00000216911,ENSP00000217026,ENSP00000336868,ENSP00000342307,ENSP00000442068	AURKA,CDC6,CDCA3,CENPA,FOXM1,MYBL2
PMID:19662092	(2009) Genome-wide profile of pleural mesothelioma versus parietal and visceral pleura: the emerging gene portrait of the mesothelioma phenotype.	7	113	6.55e-07	ENSP00000209728,ENSP00000216911,ENSP00000219097,ENSP00000301633,ENSP00000307288,ENSP00000336868,ENSP00000345571	AURKA,BIRC5,CDC6,CENPA,E2F1,MCM7,ORC6
PMID:29214152	(2017) Identification of Candidate Casein Kinase 2 Substrates in Mitosis by Quantitative Phosphoproteomics.	6	59	6.91e-07	ENSP00000216911,ENSP00000240423,ENSP00000251496,ENSP00000325017,ENSP00000349961,ENSP00000378356	AURKA,KIF20A,NCAPD2,NCAPG,NCAPH,SMC4
PMID:11136719	(2001) Chromosome condensation by a human condensin complex in Xenopus egg extracts.	4	6	8.7e-07	ENSP00000240423,ENSP00000251496,ENSP00000286398,ENSP00000325017	NCAPD2,NCAPG,NCAPH,SMC2
PMID:20501863	(2010) Identification of genes correlated with early-stage bladder cancer progression.	6	62	8.84e-07	ENSP00000209728,ENSP00000301633,ENSP00000335357,ENSP00000336868,ENSP00000378356,ENSP00000442068	BIRC5,CDC6,CDCA3,CDKN3,CENPA,KIF20A
PMID:28056781	(2017) Meta-analysis reveals conserved cell cycle transcriptional network across multiple human cell types.	6	64	1.04e-06	ENSP00000209728,ENSP00000286398,ENSP00000307288,ENSP00000336868,ENSP00000356319,ENSP00000405726	CDC45,CDC6,CENPA,KIF14,MCM7,SMC2
PMID:27022301	(2016) Identification and prioritization of candidate genes for symptom variability in breast cancer survivors based on disease characteristics at the cellular level.	5	27	1.15e-06	ENSP00000215743,ENSP00000217026,ENSP00000219097,ENSP00000301633,ENSP00000336868	BIRC5,CENPA,MMP11,MYBL2,ORC6
PMID:11815634	(2002) Condensin and cohesin display different arm conformations with characteristic hinge angles.	4	7	1.29e-06	ENSP00000251496,ENSP00000286398,ENSP00000325017,ENSP00000349961	NCAPD2,NCAPG,SMC2,SMC4
PMID:28082348	(2017) Interactome disassembly during apoptosis occurs independent of caspase cleavage.	5	28	1.31e-06	ENSP00000240423,ENSP00000251496,ENSP00000286398,ENSP00000325017,ENSP00000349961	NCAPD2,NCAPG,NCAPH,SMC2,SMC4
PMID:29228647	(2017) Timing of transcription during the cell cycle: Protein complexes binding to E2F, E2FCLE, CDECHR, or CHR promoter elements define early and late cell cycle gene expression.	5	28	1.31e-06	ENSP00000209728,ENSP00000217026,ENSP00000335357,ENSP00000342307,ENSP00000405726	CDC45,CDC6,CDKN3,FOXM1,MYBL2
PMID:16847100	(2006) Condensin I recruitment and uneven chromatin condensation precede mitotic cell death in response to DNA damage.	5	29	1.5e-06	ENSP00000216911,ENSP00000240423,ENSP00000251496,ENSP00000325017,ENSP00000349961	AURKA,NCAPD2,NCAPG,NCAPH,SMC4
PMID:25798441	(2015) The chromosomal passenger complex (CPC) as a key orchestrator of orderly mitotic exit and cytokinesis.	5	30	1.72e-06	ENSP00000301633,ENSP00000336868,ENSP00000349961,ENSP00000363524,ENSP00000378356	BIRC5,CENPA,KIF20A,KIF4A,SMC4
PMID:27029569	(2016) Stopping cells from dividing.	5	30	1.72e-06	ENSP00000216911,ENSP00000217026,ENSP00000301633,ENSP00000335357,ENSP00000342307	AURKA,BIRC5,CDKN3,FOXM1,MYBL2
PMID:11864994	(2002) In vivo dissection of the chromosome condensation machinery: reversibility of condensation distinguishes contributions of condensin and cohesin.	4	8	1.77e-06	ENSP00000240423,ENSP00000251496,ENSP00000286398,ENSP00000325017	NCAPD2,NCAPG,NCAPH,SMC2
PMID:20043860	(2010) Detection of gene pathways with predictive power for breast cancer prognosis.	5	31	1.91e-06	ENSP00000216911,ENSP00000217026,ENSP00000300403,ENSP00000301633,ENSP00000342307	AURKA,BIRC5,FOXM1,MYBL2,TPX2
PMID:29330624	(2018) Functional transcriptomic annotation and protein-protein interaction network analysis identify NEK2, BIRC5, and TOP2A as potential targets in obese patients with luminal A breast cancer.	5	31	1.91e-06	ENSP00000301633,ENSP00000342307,ENSP00000363524,ENSP00000378356,ENSP00000415430	BIRC5,FOXM1,GTSE1,KIF20A,KIF4A
PMID:17233903	(2007) Transcriptional changes associated with breast cancer occur as normal human mammary epithelial cells overcome senescence barriers and become immortalized.	6	74	2.02e-06	ENSP00000216911,ENSP00000217026,ENSP00000301633,ENSP00000307288,ENSP00000335357,ENSP00000345571	AURKA,BIRC5,CDKN3,E2F1,MCM7,MYBL2
PMID:23974109	(2013) Unbiased transcriptome signature of in vivo cell proliferation reveals pro- and antiproliferative gene networks.	5	32	2.13e-06	ENSP00000209728,ENSP00000345571,ENSP00000360944,ENSP00000363524,ENSP00000442068	CDC6,CDCA3,E2F1,KIF4A,STIL
PMID:25635998	(2015) YAP regulates S-phase entry in endothelial cells.	5	32	2.13e-06	ENSP00000209728,ENSP00000216911,ENSP00000301633,ENSP00000342307,ENSP00000405726	AURKA,BIRC5,CDC45,CDC6,FOXM1
PMID:27341628	(2016) Extensive Transcriptomic and Genomic Analysis Provides New Insights about Luminal Breast Cancers.	6	76	2.26e-06	ENSP00000216911,ENSP00000251496,ENSP00000301633,ENSP00000342307,ENSP00000356243,ENSP00000414109	AURKA,BIRC5,FOXM1,HJURP,NCAPG,UBE2T
PMID:12614612	(2003) Interaction and assembly of murine pre-replicative complex proteins in yeast and mouse cells.	4	9	2.33e-06	ENSP00000209728,ENSP00000219097,ENSP00000307288,ENSP00000405726	CDC45,CDC6,MCM7,ORC6
PMID:15148359	(2004) Isolation and characterization of a novel DNA methyltransferase complex linking DNMT3B with components of the mitotic chromosome condensation machinery.	4	9	2.33e-06	ENSP00000251496,ENSP00000286398,ENSP00000349961,ENSP00000363524	KIF4A,NCAPG,SMC2,SMC4
PMID:15326200	(2004) Human chromokinesin KIF4A functions in chromosome condensation and segregation.	4	9	2.33e-06	ENSP00000251496,ENSP00000286398,ENSP00000349961,ENSP00000363524	KIF4A,NCAPG,SMC2,SMC4
PMID:22559056	(2012) Centromere protein-A, an essential centromere protein, is a prognostic marker for relapse in estrogen receptor-positive breast cancer.	4	9	2.33e-06	ENSP00000216911,ENSP00000336868,ENSP00000342307,ENSP00000414109	AURKA,CENPA,FOXM1,HJURP
PMID:27989442	(2017) How the Eukaryotic Replisome Achieves Rapid and Efficient DNA Replication.	4	9	2.33e-06	ENSP00000209728,ENSP00000307288,ENSP00000312995,ENSP00000405726	CDC45,CDC6,CLSPN,MCM7
PMID:22046260	(2011) Altered expression of insulin receptor isoforms in breast cancer.	5	34	2.54e-06	ENSP00000216911,ENSP00000217026,ENSP00000262300,ENSP00000301633,ENSP00000415430	AURKA,BIRC5,GTSE1,MYBL2,PKMYT1
PMID:24071582	(2014) Polo-like kinase 4 transcription is activated via CRE and NRF1 elements, repressed by DREAM through CDECHR sites and deregulated by HPV E7 protein.	5	34	2.54e-06	ENSP00000217026,ENSP00000240423,ENSP00000251496,ENSP00000342307,ENSP00000349961	FOXM1,MYBL2,NCAPG,NCAPH,SMC4
PMID:28472340	(2017) MiSTIC, an integrated platform for the analysis of heterogeneity in large tumour transcriptome datasets.	5	35	2.83e-06	ENSP00000216911,ENSP00000217026,ENSP00000320147,ENSP00000336868,ENSP00000342307	AURKA,CENPA,EZH2,FOXM1,MYBL2
PMID:27463097	(2016) Levels of Ycg1 Limit Condensin Function during the Cell Cycle.	4	10	2.97e-06	ENSP00000240423,ENSP00000251496,ENSP00000325017,ENSP00000349961	NCAPD2,NCAPG,NCAPH,SMC4
PMID:25990725	(2015) Cdt1-binding protein GRWD1 is a novel histone-binding protein that facilitates MCM loading through its influence on chromatin architecture.	5	36	3.15e-06	ENSP00000209728,ENSP00000219097,ENSP00000307288,ENSP00000345571,ENSP00000405726	CDC45,CDC6,E2F1,MCM7,ORC6
PMID:27896218	(2016) Hormonal Modulation of Breast Cancer Gene Expression: Implications for Intrinsic Subtyping in Premenopausal Women.	5	36	3.15e-06	ENSP00000209728,ENSP00000217026,ENSP00000219097,ENSP00000301633,ENSP00000342307	BIRC5,CDC6,FOXM1,MYBL2,ORC6
PMID:28915555	(2017) Identification of a p53-repressed gene module in breast cancer cells.	5	36	3.15e-06	ENSP00000301633,ENSP00000325017,ENSP00000336868,ENSP00000349961,ENSP00000442068	BIRC5,CDCA3,CENPA,NCAPD2,SMC4
PMID:22284986	(2012) Cellular transformation by human papillomaviruses: lessons learned by comparing high- and low-risk viruses.	6	83	3.2e-06	ENSP00000217026,ENSP00000307288,ENSP00000312995,ENSP00000320147,ENSP00000335357,ENSP00000345571	CDKN3,CLSPN,E2F1,EZH2,MCM7,MYBL2
PMID:22344268	(2012) Identification of breast cancer prognosis markers using integrative sparse boosting.	5	37	3.39e-06	ENSP00000216911,ENSP00000217026,ENSP00000300403,ENSP00000301633,ENSP00000342307	AURKA,BIRC5,FOXM1,MYBL2,TPX2
PMID:27280975	(2016) Integration of TP53, DREAM, MMB-FOXM1 and RB-E2F target gene analyses identifies cell cycle gene regulatory networks.	6	84	3.39e-06	ENSP00000209728,ENSP00000217026,ENSP00000320147,ENSP00000336868,ENSP00000342307,ENSP00000345571	CDC6,CENPA,E2F1,EZH2,FOXM1,MYBL2
PMID:28061449	(2017) Central spindle proteins and mitotic kinesins are direct transcriptional targets of MuvB, B-MYB and FOXM1 in breast cancer cell lines and are potential targets for therapy.	5	37	3.39e-06	ENSP00000217026,ENSP00000301633,ENSP00000342307,ENSP00000356319,ENSP00000363524	BIRC5,FOXM1,KIF14,KIF4A,MYBL2
PMID:29212506	(2017) Chromosome 9p copy number gains involving PD-L1 are associated with a specific proliferation and immune-modulating gene expression program active across major cancer types.	5	37	3.39e-06	ENSP00000217026,ENSP00000300403,ENSP00000312995,ENSP00000336868,ENSP00000415430	CENPA,CLSPN,GTSE1,MYBL2,TPX2
PMID:23783031	(2013) Spatiotemporal dynamics of condensins I and II: evolutionary insights from the primitive red alga Cyanidioschyzon merolae.	4	11	3.67e-06	ENSP00000240423,ENSP00000325017,ENSP00000336868,ENSP00000349961	CENPA,NCAPD2,NCAPH,SMC4
PMID:27167114	(2016) Unveiling MYCN regulatory networks in neuroblastoma via integrative analysis of heterogeneous genomics data.	5	38	3.67e-06	ENSP00000216911,ENSP00000217026,ENSP00000301633,ENSP00000307288,ENSP00000320147	AURKA,BIRC5,EZH2,MCM7,MYBL2
PMID:28817632	(2017) Interdependency and phosphorylation of KIF4 and condensin I are essential for organization of chromosome scaffold.	4	11	3.67e-06	ENSP00000240423,ENSP00000251496,ENSP00000325017,ENSP00000363524	KIF4A,NCAPD2,NCAPG,NCAPH

## Sheet: KEGG Pathways
#term ID	term description	observed gene count	background gene count	false discovery rate	matching proteins in your network (IDs)	matching proteins in your network (labels)
hsa04110	Cell cycle	6	123	1.94e-06	ENSP00000209728,ENSP00000219097,ENSP00000262300,ENSP00000307288,ENSP00000345571,ENSP00000405726	CDC45,CDC6,E2F1,MCM7,ORC6,PKMYT1
hsa03030	DNA replication	2	36	0.0261	ENSP00000221486,ENSP00000307288	MCM7,RNASEH2A
hsa04218	Cellular senescence	3	156	0.0261	ENSP00000217026,ENSP00000342307,ENSP00000345571	E2F1,FOXM1,MYBL2

## Sheet: Reactome Pathways
#term ID	term description	observed gene count	background gene count	false discovery rate	matching proteins in your network (IDs)	matching proteins in your network (labels)
HSA-1640170	Cell Cycle	20	586	2.64e-20	ENSP00000209728,ENSP00000216911,ENSP00000217026,ENSP00000219097,ENSP00000240423,ENSP00000251496,ENSP00000262300,ENSP00000286398,ENSP00000300403,ENSP00000307288,ENSP00000312995,ENSP00000325017,ENSP00000336868,ENSP00000342307,ENSP00000345571,ENSP00000349961,ENSP00000378356,ENSP00000405726,ENSP00000414109,ENSP00000415430	AURKA,CDC45,CDC6,CENPA,CLSPN,E2F1,FOXM1,GTSE1,HJURP,KIF20A,MCM7,MYBL2,NCAPD2,NCAPG,NCAPH,ORC6,PKMYT1,SMC2,SMC4,TPX2
HSA-69278	Cell Cycle, Mitotic	18	483	8.36e-19	ENSP00000209728,ENSP00000216911,ENSP00000217026,ENSP00000219097,ENSP00000240423,ENSP00000251496,ENSP00000262300,ENSP00000286398,ENSP00000300403,ENSP00000307288,ENSP00000325017,ENSP00000336868,ENSP00000342307,ENSP00000345571,ENSP00000349961,ENSP00000378356,ENSP00000405726,ENSP00000415430	AURKA,CDC45,CDC6,CENPA,E2F1,FOXM1,GTSE1,KIF20A,MCM7,MYBL2,NCAPD2,NCAPG,NCAPH,ORC6,PKMYT1,SMC2,SMC4,TPX2
HSA-2514853	Condensation of Prometaphase Chromosomes	5	11	2.02e-09	ENSP00000240423,ENSP00000251496,ENSP00000286398,ENSP00000325017,ENSP00000349961	NCAPD2,NCAPG,NCAPH,SMC2,SMC4
HSA-69481	G2/M Checkpoints	7	148	2.17e-07	ENSP00000209728,ENSP00000219097,ENSP00000262300,ENSP00000307288,ENSP00000312995,ENSP00000405726,ENSP00000415430	CDC45,CDC6,CLSPN,GTSE1,MCM7,ORC6,PKMYT1
HSA-176187	Activation of ATR in response to replication stress	5	37	2.29e-07	ENSP00000209728,ENSP00000219097,ENSP00000307288,ENSP00000312995,ENSP00000405726	CDC45,CDC6,CLSPN,MCM7,ORC6
HSA-69620	Cell Cycle Checkpoints	8	265	3.13e-07	ENSP00000209728,ENSP00000219097,ENSP00000262300,ENSP00000307288,ENSP00000312995,ENSP00000336868,ENSP00000405726,ENSP00000415430	CDC45,CDC6,CENPA,CLSPN,GTSE1,MCM7,ORC6,PKMYT1
HSA-453274	Mitotic G2-G2/M phases	7	191	6.75e-07	ENSP00000216911,ENSP00000217026,ENSP00000262300,ENSP00000300403,ENSP00000342307,ENSP00000345571,ENSP00000415430	AURKA,E2F1,FOXM1,GTSE1,MYBL2,PKMYT1,TPX2
HSA-453279	Mitotic G1-G1/S phases	6	145	3.16e-06	ENSP00000209728,ENSP00000217026,ENSP00000219097,ENSP00000307288,ENSP00000345571,ENSP00000405726	CDC45,CDC6,E2F1,MCM7,MYBL2,ORC6
HSA-69002	DNA Replication Pre-Initiation	5	82	5.25e-06	ENSP00000209728,ENSP00000219097,ENSP00000307288,ENSP00000345571,ENSP00000405726	CDC45,CDC6,E2F1,MCM7,ORC6
HSA-68962	Activation of the pre-replicative complex	4	33	6.05e-06	ENSP00000209728,ENSP00000219097,ENSP00000307288,ENSP00000405726	CDC45,CDC6,MCM7,ORC6
HSA-68877	Mitotic Prometaphase	6	190	1.03e-05	ENSP00000240423,ENSP00000251496,ENSP00000286398,ENSP00000325017,ENSP00000336868,ENSP00000349961	CENPA,NCAPD2,NCAPG,NCAPH,SMC2,SMC4
HSA-69275	G2/M Transition	6	189	1.03e-05	ENSP00000216911,ENSP00000217026,ENSP00000262300,ENSP00000300403,ENSP00000342307,ENSP00000415430	AURKA,FOXM1,GTSE1,MYBL2,PKMYT1,TPX2
HSA-68689	CDC6 association with the ORC:origin complex	3	11	1.72e-05	ENSP00000209728,ENSP00000219097,ENSP00000345571	CDC6,E2F1,ORC6
HSA-68886	M Phase	7	343	1.72e-05	ENSP00000240423,ENSP00000251496,ENSP00000286398,ENSP00000325017,ENSP00000336868,ENSP00000349961,ENSP00000378356	CENPA,KIF20A,NCAPD2,NCAPG,NCAPH,SMC2,SMC4
HSA-69206	G1/S Transition	5	128	2.43e-05	ENSP00000209728,ENSP00000219097,ENSP00000307288,ENSP00000345571,ENSP00000405726	CDC45,CDC6,E2F1,MCM7,ORC6
HSA-156711	Polo-like kinase mediated events	3	16	3.48e-05	ENSP00000217026,ENSP00000262300,ENSP00000342307	FOXM1,MYBL2,PKMYT1
HSA-68867	Assembly of the pre-replicative complex	4	65	4.23e-05	ENSP00000209728,ENSP00000219097,ENSP00000307288,ENSP00000345571	CDC6,E2F1,MCM7,ORC6
HSA-69242	S Phase	5	156	5.21e-05	ENSP00000209728,ENSP00000219097,ENSP00000307288,ENSP00000345571,ENSP00000405726	CDC45,CDC6,E2F1,MCM7,ORC6
HSA-1538133	G0 and Early G1	3	27	0.00012	ENSP00000209728,ENSP00000217026,ENSP00000345571	CDC6,E2F1,MYBL2
HSA-539107	Activation of E2F1 target genes at G1/S	3	28	0.00013	ENSP00000209728,ENSP00000345571,ENSP00000405726	CDC45,CDC6,E2F1
HSA-69239	Synthesis of DNA	4	114	0.00028	ENSP00000209728,ENSP00000219097,ENSP00000307288,ENSP00000405726	CDC45,CDC6,MCM7,ORC6
HSA-176974	Unwinding of DNA	2	11	0.0013	ENSP00000307288,ENSP00000405726	CDC45,MCM7
HSA-68949	Orc1 removal from chromatin	3	68	0.0013	ENSP00000209728,ENSP00000219097,ENSP00000307288	CDC6,MCM7,ORC6
HSA-1362300	Transcription of E2F targets under negative control by p107 (RBL1) and p130 (RBL2) in complex with HDAC1	2	16	0.0023	ENSP00000217026,ENSP00000345571	E2F1,MYBL2
HSA-1362277	Transcription of E2F targets under negative control by DREAM complex	2	19	0.0029	ENSP00000209728,ENSP00000345571	CDC6,E2F1
HSA-113510	E2F mediated regulation of DNA replication	2	22	0.0037	ENSP00000219097,ENSP00000345571	E2F1,ORC6
HSA-69273	Cyclin A/B1/B2 associated events during G2/M transition	2	25	0.0045	ENSP00000262300,ENSP00000342307	FOXM1,PKMYT1
HSA-8953750	Transcriptional Regulation by E2F6	2	32	0.0067	ENSP00000320147,ENSP00000345571	E2F1,EZH2
HSA-2299718	Condensation of Prophase Chromosomes	2	42	0.0108	ENSP00000286398,ENSP00000349961	SMC2,SMC4
HSA-6791312	TP53 Regulates Transcription of Cell Cycle Genes	2	49	0.014	ENSP00000216911,ENSP00000345571	AURKA,E2F1
HSA-606279	Deposition of new CENPA-containing nucleosomes at the centromere	2	52	0.0152	ENSP00000336868,ENSP00000414109	CENPA,HJURP
HSA-68827	CDT1 association with the CDC6:ORC:origin complex	2	56	0.0166	ENSP00000209728,ENSP00000219097	CDC6,ORC6
HSA-983189	Kinesins	2	58	0.0172	ENSP00000363524,ENSP00000378356	KIF20A,KIF4A
HSA-8854518	AURKA Activation by TPX2	2	71	0.0246	ENSP00000216911,ENSP00000300403	AURKA,TPX2
HSA-2559580	Oxidative Stress Induced Senescence	2	92	0.0381	ENSP00000320147,ENSP00000345571	E2F1,EZH2
HSA-6804756	Regulation of TP53 Activity through Phosphorylation	2	92	0.0381	ENSP00000216911,ENSP00000300403	AURKA,TPX2
HSA-6811434	COPI-dependent Golgi-to-ER retrograde traffic	2	96	0.0393	ENSP00000363524,ENSP00000378356	KIF20A,KIF4A

## Sheet: Uniprot Keywords
#term ID	term description	observed gene count	background gene count	false discovery rate	matching proteins in your network (IDs)	matching proteins in your network (labels)
KW-0131	Cell cycle	18	640	1.35e-16	ENSP00000209728,ENSP00000216911,ENSP00000240423,ENSP00000251496,ENSP00000262300,ENSP00000286398,ENSP00000300403,ENSP00000307288,ENSP00000312995,ENSP00000325017,ENSP00000335357,ENSP00000336868,ENSP00000342307,ENSP00000345571,ENSP00000349961,ENSP00000405726,ENSP00000414109,ENSP00000442068	AURKA,CDC45,CDC6,CDCA3,CDKN3,CENPA,CLSPN,E2F1,FOXM1,HJURP,MCM7,NCAPD2,NCAPG,NCAPH,PKMYT1,SMC2,SMC4,TPX2
KW-0498	Mitosis	10	268	8.67e-10	ENSP00000209728,ENSP00000216911,ENSP00000240423,ENSP00000251496,ENSP00000286398,ENSP00000300403,ENSP00000325017,ENSP00000336868,ENSP00000349961,ENSP00000442068	AURKA,CDC6,CDCA3,CENPA,NCAPD2,NCAPG,NCAPH,SMC2,SMC4,TPX2
KW-0226	DNA condensation	5	14	3.34e-09	ENSP00000240423,ENSP00000251496,ENSP00000286398,ENSP00000325017,ENSP00000349961	NCAPD2,NCAPG,NCAPH,SMC2,SMC4
KW-0905	Primary microcephaly	4	29	4.69e-06	ENSP00000240423,ENSP00000325017,ENSP00000356319,ENSP00000360944	KIF14,NCAPD2,NCAPH,STIL
KW-0158	Chromosome	8	409	4.8e-06	ENSP00000240423,ENSP00000251496,ENSP00000286398,ENSP00000325017,ENSP00000336868,ENSP00000349961,ENSP00000363524,ENSP00000414109	CENPA,HJURP,KIF4A,NCAPD2,NCAPG,NCAPH,SMC2,SMC4
KW-0597	Phosphoprotein	28	8066	4.8e-06	ENSP00000005286,ENSP00000209728,ENSP00000216911,ENSP00000217026,ENSP00000219097,ENSP00000221486,ENSP00000240423,ENSP00000251496,ENSP00000262300,ENSP00000263382,ENSP00000300403,ENSP00000307288,ENSP00000312995,ENSP00000320147,ENSP00000325017,ENSP00000336868,ENSP00000342307,ENSP00000345571,ENSP00000349961,ENSP00000356243,ENSP00000356319,ENSP00000360944,ENSP00000363524,ENSP00000378356,ENSP00000405726…	ASF1B,AURKA,CDC45,CDC6,CDCA3,CENPA,CLSPN,E2F1,EZH2,FOXM1,GTSE1,HJURP,KIF14,KIF20A,KIF4A,MCM7,MYBL2,NCAPD2,NCAPG,NCAPH,ORC6,PKMYT1,RNASEH2A,SMC4,STIL,TMEM132A,TPX2,UBE2T
KW-0539	Nucleus	22	5200	1.94e-05	ENSP00000209728,ENSP00000217026,ENSP00000219097,ENSP00000221486,ENSP00000240423,ENSP00000251496,ENSP00000263382,ENSP00000286398,ENSP00000300403,ENSP00000307288,ENSP00000312995,ENSP00000320147,ENSP00000325017,ENSP00000336868,ENSP00000342307,ENSP00000345571,ENSP00000349961,ENSP00000356243,ENSP00000356319,ENSP00000363524,ENSP00000405726,ENSP00000414109	ASF1B,CDC45,CDC6,CENPA,CLSPN,E2F1,EZH2,FOXM1,HJURP,KIF14,KIF4A,MCM7,MYBL2,NCAPD2,NCAPG,NCAPH,ORC6,RNASEH2A,SMC2,SMC4,TPX2,UBE2T
KW-0832	Ubl conjugation	15	2380	2.29e-05	ENSP00000216911,ENSP00000217026,ENSP00000219097,ENSP00000240423,ENSP00000300403,ENSP00000307288,ENSP00000312995,ENSP00000320147,ENSP00000336868,ENSP00000342307,ENSP00000356243,ENSP00000360944,ENSP00000363524,ENSP00000414109,ENSP00000442068	AURKA,CDCA3,CENPA,CLSPN,EZH2,FOXM1,HJURP,KIF4A,MCM7,MYBL2,NCAPH,ORC6,STIL,TPX2,UBE2T
KW-0493	Microtubule	6	275	5.86e-05	ENSP00000216911,ENSP00000300403,ENSP00000356319,ENSP00000363524,ENSP00000378356,ENSP00000415430	AURKA,GTSE1,KIF14,KIF20A,KIF4A,TPX2
KW-0067	ATP-binding	11	1367	7.37e-05	ENSP00000166345,ENSP00000209728,ENSP00000216911,ENSP00000262300,ENSP00000286398,ENSP00000307288,ENSP00000349961,ENSP00000356243,ENSP00000356319,ENSP00000363524,ENSP00000378356	AURKA,CDC6,KIF14,KIF20A,KIF4A,MCM7,PKMYT1,SMC2,SMC4,TRIP13,UBE2T
KW-0235	DNA replication	4	97	0.00018	ENSP00000209728,ENSP00000219097,ENSP00000307288,ENSP00000405726	CDC45,CDC6,MCM7,ORC6
KW-1017	Isopeptide bond	11	1713	0.00051	ENSP00000216911,ENSP00000217026,ENSP00000219097,ENSP00000240423,ENSP00000300403,ENSP00000307288,ENSP00000320147,ENSP00000342307,ENSP00000356243,ENSP00000363524,ENSP00000414109	AURKA,EZH2,FOXM1,HJURP,KIF4A,MCM7,MYBL2,NCAPH,ORC6,TPX2,UBE2T
KW-0505	Motor protein	3	131	0.0087	ENSP00000356319,ENSP00000363524,ENSP00000378356	KIF14,KIF20A,KIF4A
KW-0225	Disease mutation	12	2951	0.0117	ENSP00000166345,ENSP00000209728,ENSP00000219097,ENSP00000221486,ENSP00000240423,ENSP00000320147,ENSP00000325017,ENSP00000335357,ENSP00000356243,ENSP00000356319,ENSP00000360944,ENSP00000405726	CDC45,CDC6,CDKN3,EZH2,KIF14,NCAPD2,NCAPH,ORC6,RNASEH2A,STIL,TRIP13,UBE2T
KW-0242	Dwarfism	3	155	0.0117	ENSP00000209728,ENSP00000219097,ENSP00000405726	CDC45,CDC6,ORC6
KW-9995	Disease	14	3799	0.0117	ENSP00000166345,ENSP00000209728,ENSP00000216911,ENSP00000219097,ENSP00000221486,ENSP00000240423,ENSP00000320147,ENSP00000325017,ENSP00000335357,ENSP00000356243,ENSP00000356319,ENSP00000360944,ENSP00000363524,ENSP00000405726	AURKA,CDC45,CDC6,CDKN3,EZH2,KIF14,KIF4A,NCAPD2,NCAPH,ORC6,RNASEH2A,STIL,TRIP13,UBE2T
KW-0206	Cytoskeleton	7	1198	0.0159	ENSP00000216911,ENSP00000300403,ENSP00000356319,ENSP00000360944,ENSP00000363524,ENSP00000378356,ENSP00000415430	AURKA,GTSE1,KIF14,KIF20A,KIF4A,STIL,TPX2
KW-0963	Cytoplasm	16	4972	0.016	ENSP00000209728,ENSP00000216911,ENSP00000240423,ENSP00000251496,ENSP00000286398,ENSP00000300403,ENSP00000325017,ENSP00000335357,ENSP00000349961,ENSP00000356319,ENSP00000360944,ENSP00000363524,ENSP00000378356,ENSP00000405726,ENSP00000415430,ENSP00000442068	AURKA,CDC45,CDC6,CDCA3,CDKN3,GTSE1,KIF14,KIF20A,KIF4A,NCAPD2,NCAPG,NCAPH,SMC2,SMC4,STIL,TPX2
KW-0238	DNA-binding	9	1952	0.0174	ENSP00000217026,ENSP00000219097,ENSP00000307288,ENSP00000312995,ENSP00000336868,ENSP00000342307,ENSP00000345571,ENSP00000363524,ENSP00000414109	CENPA,CLSPN,E2F1,FOXM1,HJURP,KIF4A,MCM7,MYBL2,ORC6
KW-0007	Acetylation	12	3335	0.0252	ENSP00000166345,ENSP00000221486,ENSP00000240423,ENSP00000262300,ENSP00000286398,ENSP00000300403,ENSP00000307288,ENSP00000312995,ENSP00000345571,ENSP00000349961,ENSP00000360944,ENSP00000378356	CLSPN,E2F1,KIF20A,MCM7,NCAPH,PKMYT1,RNASEH2A,SMC2,SMC4,STIL,TPX2,TRIP13
KW-0621	Polymorphism	27	11707	0.0252	ENSP00000005286,ENSP00000209728,ENSP00000215743,ENSP00000216911,ENSP00000217026,ENSP00000219097,ENSP00000221486,ENSP00000240423,ENSP00000251496,ENSP00000262300,ENSP00000286398,ENSP00000300403,ENSP00000307288,ENSP00000312995,ENSP00000320147,ENSP00000325017,ENSP00000335357,ENSP00000342307,ENSP00000345571,ENSP00000349961,ENSP00000356319,ENSP00000360944,ENSP00000363524,ENSP00000378356,ENSP00000405726…	AURKA,CDC45,CDC6,CDKN3,CLSPN,E2F1,EZH2,FOXM1,GTSE1,HJURP,KIF14,KIF20A,KIF4A,MCM7,MMP11,MYBL2,NCAPD2,NCAPG,NCAPH,ORC6,PKMYT1,RNASEH2A,SMC2,SMC4,STIL,TMEM132A,TPX2

## Sheet: PFAM Protein Domains
#term ID	term description	observed gene count	background gene count	false discovery rate	matching proteins in your network (IDs)	matching proteins in your network (labels)
PF00225	Kinesin motor domain	3	44	0.0024	ENSP00000356319,ENSP00000363524,ENSP00000378356	KIF14,KIF20A,KIF4A
PF02463	RecF/RecN/SMC N terminal domain	2	7	0.0024	ENSP00000286398,ENSP00000349961	SMC2,SMC4
PF06470	SMC proteins Flexible Hinge Domain	2	6	0.0024	ENSP00000286398,ENSP00000349961	SMC2,SMC4
PF13401	AAA domain	2	5	0.0024	ENSP00000166345,ENSP00000209728	CDC6,TRIP13
PF13476	AAA domain	2	7	0.0024	ENSP00000286398,ENSP00000349961	SMC2,SMC4
PF16796	Microtubule binding	3	43	0.0024	ENSP00000356319,ENSP00000363524,ENSP00000378356	KIF14,KIF20A,KIF4A
PF00004	ATPase family associated with various cellular activities (AAA)	2	56	0.0251	ENSP00000166345,ENSP00000209728	CDC6,TRIP13

## Sheet: INTERPRO Protein Dom. and Feat.
#term ID	term description	observed gene count	background gene count	false discovery rate	matching proteins in your network (IDs)	matching proteins in your network (labels)
IPR001752	Kinesin motor domain	3	44	0.0044	ENSP00000356319,ENSP00000363524,ENSP00000378356	KIF14,KIF20A,KIF4A
IPR003395	RecF/RecN/SMC, N-terminal	2	6	0.0044	ENSP00000286398,ENSP00000349961	SMC2,SMC4
IPR010935	SMCs flexible hinge	2	6	0.0044	ENSP00000286398,ENSP00000349961	SMC2,SMC4
IPR019821	Kinesin motor domain, conserved site	3	41	0.0044	ENSP00000356319,ENSP00000363524,ENSP00000378356	KIF14,KIF20A,KIF4A
IPR024704	Structural maintenance of chromosomes protein	2	5	0.0044	ENSP00000286398,ENSP00000349961	SMC2,SMC4
IPR027417	P-loop containing nucleoside triphosphate hydrolase	8	849	0.0044	ENSP00000166345,ENSP00000209728,ENSP00000286398,ENSP00000307288,ENSP00000349961,ENSP00000356319,ENSP00000363524,ENSP00000378356	CDC6,KIF14,KIF20A,KIF4A,MCM7,SMC2,SMC4,TRIP13
IPR027640	Kinesin-like protein	3	43	0.0044	ENSP00000356319,ENSP00000363524,ENSP00000378356	KIF14,KIF20A,KIF4A
IPR036277	SMCs flexible hinge superfamily	2	6	0.0044	ENSP00000286398,ENSP00000349961	SMC2,SMC4
IPR036961	Kinesin motor domain superfamily	3	79	0.0044	ENSP00000356319,ENSP00000363524,ENSP00000378356	KIF14,KIF20A,KIF4A
IPR003593	AAA+ ATPase domain	3	134	0.0125	ENSP00000166345,ENSP00000209728,ENSP00000307288	CDC6,MCM7,TRIP13
IPR001005	SANT/Myb domain	2	48	0.0233	ENSP00000217026,ENSP00000320147	EZH2,MYBL2
IPR036390	Winged helix DNA-binding domain superfamily	3	209	0.0357	ENSP00000209728,ENSP00000342307,ENSP00000345571	CDC6,E2F1,FOXM1
IPR036388	Winged helix-like DNA-binding domain superfamily	3	230	0.0428	ENSP00000209728,ENSP00000342307,ENSP00000345571	CDC6,E2F1,FOXM1

## Sheet: SMART Protein Domains
#term ID	term description	observed gene count	background gene count	false discovery rate	matching proteins in your network (IDs)	matching proteins in your network (labels)
SM00129	Kinesin motor, catalytic domain. ATPase.	3	44	0.0011	ENSP00000356319,ENSP00000363524,ENSP00000378356	KIF14,KIF20A,KIF4A
SM00968	SMC proteins Flexible Hinge Domain	2	6	0.0011	ENSP00000286398,ENSP00000349961	SMC2,SMC4
SM01114	Tesmin/TSO1-like CXC domain	2	7	0.0011	ENSP00000320147,ENSP00000363524	EZH2,KIF4A
SM00382	ATPases associated with a variety of cellular activities	3	144	0.0081	ENSP00000166345,ENSP00000209728,ENSP00000307288	CDC6,MCM7,TRIP13
SM00717	SANT SWI3, ADA2, N-CoR and TFIIIB'' DNA-binding domains	2	50	0.0118	ENSP00000217026,ENSP00000320147	EZH2,MYBL2
