# Supplementary figures and images for: Identification of KIF4A as a pan-cancer diagnostic and prognostic biomarker via bioinformatics analysis and validation in osteosarcoma cell lines
Source: PeerJ journal article supplement (doi:10.7717/peerj.11455), 2021-05-21

**
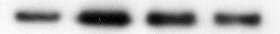
** KIF4A


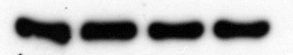
 actin

hFOB1.19、mg63、U-20S、Hos

| 编号 | hFOB | mg63 | U-20S | Hos |
| --- | --- | --- | --- | --- |
| KIF4A | 19.10 | 70.85 | 51.85 | 30.46 |
| actin | 115.86 | 119.09 | 112.82 | 101.84 |
| KIF4A/actin | 0.16 | 0.59 | 0.46 | 0.30 |

Supplement: fig2B-WB-raw-data.zip [file fig2B-WB-raw-data.zip]
